# Supplementary material
Source: ML conference proceedings conference paper supplement (https://openreview.net/forum?id=LlEJZ7x0R8)
Supplement: supplementary_material [file appendix.pdf › supp/appendix.pdf]

| Quantity                                                                                                                          | Description                                                                 | Introduced in |
|-----------------------------------------------------------------------------------------------------------------------------------|-----------------------------------------------------------------------------|---------------|
| $\mathbf{A} \in \mathbb{R}^{d \times d}, \mathbf{m} \in \mathbb{R}^d$                                                             | Multivariate Ornstein-Uhlenbeck drift parameters                            | Eq. (1)       |
| $\mathbf{D} = \frac{1}{2} \boldsymbol{\sigma} \boldsymbol{\sigma}^\top$                                                           | Multivariate Ornstein-Uhlenbeck diffusivity                                 | Eq. (1)       |
| $\mathbb{P}$                                                                                                                      | Schrödinger bridge path measure                                             | Section 2.1   |
| $\mathbb{Q}$                                                                                                                      | Reference process path measure                                              | Section 2.1   |
| $\boldsymbol{\mu}_t^{\mathbf{x}_0}, \boldsymbol{\Sigma}_t$                                                                        | Unconditional mean and covariance of mvOU process started at $\mathbf{x}_0$ | Section 3.1   |
| $\mathbf{p}_{t (\mathbf{x}_0, \mathbf{x}_T)}$                                                                                     | Conditional density of mvOU bridge                                          | Section 3.1   |
| $\mathbf{c}_{t (\mathbf{x}_0, \mathbf{x}_T)}$                                                                                     | mvOU bridge control between $(\mathbf{x}_0, \mathbf{x}_T)$                  | Section 3.1   |
| $\boldsymbol{\mu}_{t (\mathbf{x}_0, \mathbf{x}_T)}, \boldsymbol{\Sigma}_{t (\mathbf{x}_0, \mathbf{x}_T)} = \boldsymbol{\Omega}_t$ | Conditional mean and covariance of mvOU bridge                              | Section 3.1   |
| $\boldsymbol{\Omega}_{st}$                                                                                                        | Conditional covariance process of mvOU bridge                               | Section 3.1   |
| $\mathbf{u}_{t (\mathbf{x}_0, \mathbf{x}_T)}, \mathbf{s}_{t (\mathbf{x}_0, \mathbf{x}_T)}$                                        | Conditional probability flow and score field of mvOU bridge                 | Section 3.1   |
| $\mathcal{N}(\mathbf{a}, \mathcal{A}), \mathcal{N}(\mathbf{b}, \mathcal{B})$                                                      | Initial and terminal mvOU-GSB marginals                                     | Section 3.2   |
| $\mathcal{N}(\bar{\mathbf{a}}, \bar{\mathcal{A}}), \mathcal{N}(\bar{\mathbf{b}}, \bar{\mathcal{B}})$                              | Transformed mvOU-GSB marginals                                              | Section 3.2   |
| $\bar{\mathcal{C}}$                                                                                                               | Cross-covariance of entropic transport plan                                 | Section 3.2   |
| $\mathfrak{A}_t, \mathfrak{B}_t, \mathbf{c}_t$                                                                                    | Key quantities for the mvOU-GSB                                             | Section 3.2   |
| $\boldsymbol{\nu}_t$                                                                                                              | mvOU-GSB mean process                                                       | Section 3.2   |
| $\boldsymbol{\Xi}_t, \boldsymbol{\Xi}_{st}$                                                                                       | mvOU-GSB variance and covariance process                                    | Section 3.2   |
| $\mathbf{S}_t^\top \boldsymbol{\Xi}_t^{-1}$                                                                                       | SDE drift matrix of mvOU-GSB                                                | Section 3.2   |

Table 3: Glossary of some key notations and quantities used in the statements of our theoretical results.

#### 444 **A.1 Some calculations on multivariate Ornstein-Uhlenbeck processes**

445 For convenience, we first collect some results about multivariate Ornstein-Uhlenbeck processes of  
446 the form (1), a detailed discussion of mvOU processes can be found in e.g. [50]. For a *time-invariant*  
447 process with drift matrix  $\mathbf{A}$  and diffusion  $\boldsymbol{\sigma}$ , we have that

$$(X_t | X_0 = \mathbf{x}_0) \sim \mathcal{N}(\boldsymbol{\mu}_t, \boldsymbol{\Sigma}_t),$$

448 where

$$\boldsymbol{\mu}_t = e^{t\mathbf{A}} \mathbf{x}_0, \quad \boldsymbol{\Sigma}_t = \int_0^t e^{(t-\tau)\mathbf{A}} \boldsymbol{\sigma} \boldsymbol{\sigma}^\top e^{(t-\tau)\mathbf{A}^\top} d\tau. \quad (20)$$

449 If  $X_0 \sim \mathcal{N}(\boldsymbol{\mu}_0, \boldsymbol{\Sigma}_0)$  and writing  $X_{0t} = X_0 \oplus X_t$ , some tedious but straightforward applications of  
450 conditional expectations and the tower property reveal that

$$X_{0t} \sim \mathcal{N}(\boldsymbol{\mu}_{0t}, \boldsymbol{\Sigma}_{0t}), \quad \boldsymbol{\mu}_{0t} = \boldsymbol{\mu}_0 \oplus e^{t\mathbf{A}} \boldsymbol{\mu}_0, \quad \boldsymbol{\Sigma}_{0t} = \begin{bmatrix} \boldsymbol{\Sigma}_0 & \boldsymbol{\Sigma}_0 e^{t\mathbf{A}^\top} \\ e^{t\mathbf{A}} \boldsymbol{\Sigma}_0 & \boldsymbol{\Sigma}_t + e^{t\mathbf{A}} \boldsymbol{\Sigma}_0 e^{t\mathbf{A}^\top} \end{bmatrix}. \quad (21)$$

451 More generally, for a process  $dX_t = (\mathbf{A}X_t + \mathbf{b})dt + \boldsymbol{\sigma}dB_t$ , one has:

$$\boldsymbol{\mu}_t = e^{t\mathbf{A}} \mathbf{x}_0 + (e^{t\mathbf{A}} - \mathbf{I})(\mathbf{A}^{-1}\mathbf{b}), \quad \boldsymbol{\Sigma}_t = \int_0^t e^{(t-s)\mathbf{A}} \boldsymbol{\sigma} \boldsymbol{\sigma}^\top e^{(t-s)\mathbf{A}^\top} ds. \quad (22)$$

452 The expressions for the covariance of the mvOU process can be obtained from the fact that the  
453 covariance evolves following a *Lyapunov equation*. For the case of constant coefficients, we state the  
454 following result.

455 **Lyapunov equation solution** It is easy to verify that  $\dot{\mathbf{G}}_t = \mathbf{A}\mathbf{G}_t + \mathbf{G}_t\mathbf{A}^\top + \mathbf{Q}_t$  has solution

$$\mathbf{G}_t = \int_0^t e^{(t-s)\mathbf{A}} \mathbf{Q}_s e^{(t-s)\mathbf{A}^\top} ds.$$

#### 456 **A.2 Bridges of multivariate Ornstein-Uhlenbeck processes**

457 This problem has been studied by Chen et al. in [8], however the material therein is geared towards a  
458 control audience and considers a more general case where all coefficients are time-dependent. We  
459 will re-derive the results that we will need for processes of the form (1). Additionally, while in  
460 practice we typically use  $\boldsymbol{\sigma} = \sigma\mathbf{I}$ , we state some results in the general setting of non-isotropic noise.

461 **Derivation of the dynamical OU-bridge (Theorem 1)** Consider a mvOU process

$$d\mathbf{X}_t = (\mathbf{A}\mathbf{X}_t + \mathbf{b}) dt + \boldsymbol{\sigma} d\mathbf{B}_t. \quad (23)$$

462 Now form the *controlled* version pinned at  $(0, \mathbf{x}_0)$  and  $(T, \mathbf{x}_T)$ , where  $\mathbf{u}_t(\mathbf{X}_t)$  is an additional force  
463 arising from the conditioning of the process at an endpoint:

$$d\mathbf{X}_t = (\mathbf{A}\mathbf{X}_t + \mathbf{b} + \mathbf{u}_t(\mathbf{X}_t)) dt + \boldsymbol{\sigma} d\mathbf{B}_t. \quad (24)$$

464 The main result that we need is that  $\mathbf{u}_t(\mathbf{x})$  is itself a linear time-dependent field whose coefficients  
465 are independent of  $(\mathbf{x}_0, \mathbf{x}_T)$ . In the above we consider the simplest case of classical optimal control,  
466 where the control is *directly* added to the system drift and there is no unobserved system.

467 Consider the system started at  $(0, \mathbf{x}_0)$  and pinned to  $(T, \mathbf{x}_T)$ . For now, we make all statements for  
468 time-dependent coefficients and the diffusion is non-isotropic. We then form the Lagrangian:

$$\min_{\mathbf{u}} \mathbb{E} \left\{ \int_0^T \|\mathbf{u}_t\|^2 dt + \sup_{\lambda} \lambda \|\mathbf{X}_T - \mathbf{x}_T\|^2 \right\} = \sup_{\lambda} \min_{\mathbf{u}} \mathbb{E} \left\{ \int_0^T \|\mathbf{u}_t\|^2 dt + \lambda \|\mathbf{X}_T - \mathbf{x}_T\|^2 \right\}$$

469 Fixing some  $\lambda > 0$ , the resulting problem is known as a *linear-quadratic-Gaussian* problem [27] in  
470 the control literature:

$$\min_{\mathbf{u}} \mathbb{E} \left\{ \frac{1}{2} \int_0^T \|\mathbf{u}_t\|^2 dt + \frac{\lambda}{2} \|\mathbf{X}_T - \mathbf{x}_T\|^2 \right\}, \quad (25)$$

471 for which we can write a HJB equation:

$$0 = \partial_t V_t(\mathbf{x}) + \min_{\mathbf{u}} \left\{ \tilde{\mathcal{A}}_t[V_t](\mathbf{x}, \mathbf{u}_t(\mathbf{x})) + \frac{1}{2} \|\mathbf{u}_t(\mathbf{x})\|^2 \right\}, \quad (26)$$

472 subject to the terminal boundary condition  $V_T(\mathbf{x}) = \frac{\lambda}{2} \|\mathbf{x} - \mathbf{x}_T\|^2$ , and the operators  $\tilde{\mathcal{A}}, \mathcal{A}$  are defined  
473 as

$$\tilde{\mathcal{A}}_t[f] = \langle \mathbf{A}_t \mathbf{x} + \mathbf{b}_t + \mathbf{u}_t, \nabla_x f \rangle + \frac{1}{2} \nabla_x \cdot (\boldsymbol{\sigma}_t \boldsymbol{\sigma}_t^\top \nabla_x f), \quad (27)$$

$$\mathcal{A}_t[f] = \langle \mathbf{A}_t \mathbf{x} + \mathbf{b}_t, \nabla_x f \rangle + \frac{1}{2} \nabla_x \cdot (\boldsymbol{\sigma}_t \boldsymbol{\sigma}_t^\top \nabla_x f), \quad (28)$$

474 these are the generators of the controlled (24) and uncontrolled (23) SDEs respectively. Substituting  
475 all these in, we find that the HJBE is

$$0 = \partial_t V_t(\mathbf{x}) + \mathcal{A}_t[V_t](\mathbf{x}) + \min_{\mathbf{u}} \left[ \langle \mathbf{u}_t, \nabla_x V_t \rangle + \frac{1}{2} \|\mathbf{u}_t\|^2 \right]. \quad (29)$$

476 It follows from the first order condition on the “inner” problem that  $\mathbf{u}_t = -\nabla_x V_t$ , so

$$0 = \partial_t V_t(\mathbf{x}) + \mathcal{A}_t[V_t](\mathbf{x}) - \frac{1}{2} \|\nabla_x V_t(\mathbf{x})\|^2. \quad (30)$$

477 Use an ansatz that the value function is quadratic:

$$V_t(\mathbf{x}) = \frac{1}{2} \mathbf{x}^\top \mathbf{M}_t \mathbf{x} + \mathbf{c}_t^\top \mathbf{x} + d_t \implies \nabla_x V_t(\mathbf{x}) = \mathbf{M}_t \mathbf{x} + \mathbf{c}_t. \quad (31)$$

478 Then:

$$\mathcal{A}_t[V_t] = \mathbf{x}^\top (\mathbf{A}_t^\top \mathbf{M}_t) \mathbf{x} + \langle \mathbf{A}_t^\top \mathbf{c}_t + \mathbf{M}_t \mathbf{b}_t, \mathbf{x} \rangle + \langle \mathbf{b}_t, \mathbf{c}_t \rangle + \frac{1}{2} \text{tr}(\boldsymbol{\sigma}_t \boldsymbol{\sigma}_t^\top \mathbf{M}_t). \quad (32)$$

479 Now note that the quadratic form only depends on the *symmetric* part of the matrix, i.e.

$$\mathbf{x}^\top \mathbf{A}_t^\top \mathbf{M}_t \mathbf{x} = \frac{1}{2} \mathbf{x}^\top (\mathbf{A}_t^\top \mathbf{M}_t + \mathbf{M}_t \mathbf{A}_t) \mathbf{x}.$$

480 The HJBE is therefore

$$\begin{aligned} 0 = & \frac{1}{2} \mathbf{x}^\top \dot{\mathbf{M}}_t \mathbf{x} + \dot{\mathbf{c}}_t^\top \mathbf{x} + \dot{d}_t \\ & + \frac{1}{2} \mathbf{x}^\top (\mathbf{A}_t^\top \mathbf{M}_t + \mathbf{M}_t \mathbf{A}_t) \mathbf{x} + (\mathbf{A}_t^\top \mathbf{c}_t + \mathbf{M}_t^\top \mathbf{b}_t)^\top \mathbf{x} + \mathbf{b}_t^\top \mathbf{c}_t + \frac{1}{2} \text{tr}(\boldsymbol{\sigma}_t \boldsymbol{\sigma}_t^\top \mathbf{M}_t) \\ & - \frac{1}{2} (\mathbf{M}_t \mathbf{x} + \mathbf{c}_t)^\top (\mathbf{M}_t \mathbf{x} + \mathbf{c}_t) \end{aligned} \quad (33)$$

481 So

$$0 = \dot{M}_t + A_t^\top M_t + M_t A_t - M_t^2, \quad (34)$$

$$0 = \dot{c}_t + A_t^\top c_t + M_t b_t - M_t c_t. \quad (35)$$

482 with the boundary condition  $M_T = \lambda I$  and  $c_t = -\lambda x_T$ .

483 Let  $\Lambda_t = M_t^{-1}$ , so that  $\dot{\Lambda}_t = -M_t^{-1} \dot{M}_t M_t^{-1} = -\Lambda_t \dot{M}_t \Lambda_t$ . Substituting, we find that

$$\dot{\Lambda}_t = \Lambda_t A_t^\top + A_t \Lambda_t - I. \quad (36)$$

484 Actually we can rewrite the value function in a different way, which is more convenient for us:

$$V_t(x) = \frac{1}{2}(x - k_t)^\top M_t(x - k_t) + \text{const}$$

485 in which case  $c_t = -M_t k_t$ , and so we have  $k_T = x_T$ . The corresponding ODE for  $k_t$  is

$$\dot{k}_t = A_t k_t + b_t. \quad (37)$$

486 Let us now specialise to the case of time-invariant coefficients, which allows us to write down explicit  
487 expressions for the solutions:

$$\dot{k}_t = A k_t + b \implies k_t = e^{-(T-t)A}(x_T + A^{-1}b) - A^{-1}b. \quad (38)$$

488 Rewriting the SDE drift to have the form  $Ax + b = A(x - m)$  we have that  $b = -Am \implies$   
489  $A^{-1}b = -m$ , when  $A$  is nonsingular. Then:

$$k_t = e^{-(T-t)A}(x_T - m) + m. \quad (39)$$

490 Now we deal with the quadratic term  $\Lambda_t$ . Let  $G_\tau = \Lambda_{T-\tau}$ , so that  $\partial_\tau G_\tau = -\dot{\Lambda}_{T-\tau}$ . Then  $G_\tau$   
491 satisfies

$$\partial_\tau G_\tau = -G_\tau A^\top - A G_\tau + I, \quad G_0 = 0. \quad (40)$$

492 So

$$G_\tau = \int_0^\tau e^{-(\tau-s)A} e^{-(\tau-s)A^\top} ds. \quad (41)$$

493 Substituting back, we find that

$$\Lambda_t = \int_0^{T-t} e^{-(T-t-s)A} e^{-(T-t-s)A^\top} ds = \int_0^{T-t} e^{-sA} e^{-sA^\top} ds. \quad (42)$$

494 The bridge control is therefore

$$u_{t|(x_0, x_T)} = -\Lambda_t^{-1}(x - k_t) \quad (43)$$

495 For the general case of non-constant coefficients, we express them as solutions of ODEs with terminal  
496 boundary conditions.

$$\dot{k}_t = A_t k_t + b_t, \quad k_T = x_T, \quad (44)$$

$$\dot{\Lambda}_t = \Lambda_t A_t^\top + A_t \Lambda_t - I, \quad \Lambda_T = 0. \quad (45)$$

497 In practice, both of these equations can be approximately solved by numerical integration in time.

498 Finally we remark here that the diffusion component does not play a role in the control, which is  
499 classical.

500 **“Static” Ornstein-Uhlenbeck bridge statistics (Theorem 2)** As was studied by [8] for a more  
501 general scenario of time-varying processes, the mvOU process and its conditioned versions are  
502 Gaussian processes. Under these assumptions,  $(X_s, X_t)$  has joint mean

$$\mu_s \oplus \mu_t, \quad (46)$$

503 and covariance

$$\begin{bmatrix} \Phi_s & \Phi_s e^{(t-s)A^\top} \\ e^{(t-s)A} \Phi_s & \Phi_t \end{bmatrix}. \quad (47)$$

504 where  $\Phi_t$  is the covariance of the process started from a point mass at time  $t$ :

$$\Phi_t = \int_0^t e^{(t-s)A} \sigma \sigma^\top e^{(t-s)A^\top} ds, \quad \Phi_t = \Phi_{t-s} + e^{(t-s)A} \Phi_s e^{(t-s)A^\top}. \quad (48)$$

505 By taking the Schur complement, we have that  $X_s | X_t$  is distributed with variance

$$\mathbb{V}[X_s | X_t] = \Phi_s - \Phi_s e^{(t-s)A^\top} \Phi_t^{-1} e^{(t-s)A} \Phi_s \quad (49)$$

506 and mean

$$\mathbb{E}[X_s | X_t] = \mu_s + \Phi_s e^{(t-s)A^\top} \Phi_t^{-1} (X_t - \mu_t). \quad (50)$$

507 More generally, we can consider the three-point correlation  $(X_r, X_s, X_t)$ . Then the mean is  
508  $\mu_r \oplus \mu_s \oplus \mu_t$  and the covariance is

$$\begin{bmatrix} \Phi_r & \Phi_r e^{(s-r)A^\top} & \Phi_r e^{(t-r)A^\top} \\ \cdot & \Phi_s & \Phi_s e^{(t-s)A^\top} \\ \cdot & \cdot & \Phi_t \end{bmatrix} \quad (51)$$

509 Using the Schur complement again, we have that  $(X_r, X_s) | X_t$  has covariance

$$\mathbb{V}[X_r, X_s | X_t] = \Phi_r e^{(s-r)A^\top} - \Phi_r e^{(t-r)A^\top} \Phi_t^{-1} e^{(t-s)A} \Phi_s. \quad (52)$$

510 For the case of time-varying coefficients, we need to introduce the state transition matrix  $\Psi_{ts}$  [27]  
511 which describes the deterministic aspects of evolution between  $s < t$  under  $(A_t)_t$ . That is, for a  
512 dynamics  $\dot{x}_t = A_t x_t$  one has  $x_t = \Psi_{t,s} x_s$  and  $\Psi(t, s) = \Psi(t, r) \Psi(r, s)$  for  $t \geq r \geq s$ . In this  
513 case there is not an explicit expression for  $\Phi_t$ . Instead, let  $(\Phi_t)_t$  be the unconditional variance  
514 evolutions for such a process started at  $t = 0$ , obtained by solving

$$\dot{\Phi}_t = A_t \Phi_t + \Phi_t A_t^\top + \sigma_t \sigma_t^\top, \quad \Phi_0 = 0. \quad (53)$$

515 Then the more general result from [8] for the covariance of  $(X_r, X_s, X_t)$  is

$$\begin{bmatrix} \Phi_r & \Phi_r \Psi_{sr}^\top & \Phi_r \Psi_{tr}^\top \\ \Psi_{sr} \Phi_r & \Phi_s & \Phi_s \Psi_{ts}^\top \\ \Psi_{tr} \Phi_r & \Psi_{ts} \Phi_s & \Phi_t \end{bmatrix} \quad (54)$$

516 From this result, the same Schur complement computation yields expressions for the conditional  
517 covariances and mean:

$$\mathbb{V}[X_r, X_s | X_t] = \Phi_r \Psi_{sr}^\top - \Phi_r \Psi_{tr}^\top \Phi_t^{-1} \Psi_{ts} \Phi_s, \quad (55)$$

$$\mathbb{V}[X_s | X_t] = \Phi_s - \Phi_s \Psi_{ts}^\top \Phi_t^{-1} \Psi_{ts} \Phi_s, \quad (56)$$

$$\mathbb{E}[X_s | X_t] = \mu_s + \Phi_s \Psi_{ts}^\top \Phi_t^{-1} (X_t - \mu_t) \quad (57)$$

### 518 A.3 Simulation-free Schrödinger bridges with linear reference dynamics

519 Having characterised the solution of the SBP for general reference processes and now that we have  
520 derived the score and flow for the Ornstein-Uhlenbeck bridge, the path is clear towards a simulation-  
521 free scheme for learning Schrödinger bridges where the reference dynamics are given by a *linear*  
522 SDE.

523 For solution of the static SBP problem ([18] (equivalently, (SBP-static))), the transition kernel of the  
524 reference dynamics is given by

$$\begin{aligned} \frac{dQ_{0t}}{dx \otimes dx}(x_0, x_t) &= \frac{1}{Z_t} \exp \left( -\frac{1}{2} (x_t - \mu_t^{x_0})^\top \Sigma_t^{-1} (x_t - \mu_t^{x_0}) \right) \frac{dQ_0}{dx}(x_0) \\ \implies -\log \left( \frac{dQ_{0t}}{dx \otimes dx} \right) &= \frac{1}{2} (x_t - \mu_t^{x_0})^\top \Sigma_t^{-1} (x_t - \mu_t^{x_0}) + \log Z_t - \log \left( \frac{dQ_0}{dx}(x_0) \right), \end{aligned} \quad (58)$$

525 where  $\mu_t^{x_0}$  denotes the mean at time  $t$  conditional on  $(0, x_0)$ . Notably, the last two terms depend  
526 only on  $x_0$ . It is a classical result (and very easy to show) that these kinds of terms do not affect the  
527 minimiser of ([18]) and so they are immaterial. The cost function to use is thus effectively

$$C(x_0, x_t) = \frac{1}{2} (x_t - \mu_t^{x_0})^\top \Sigma_t^{-1} (x_t - \mu_t^{x_0}). \quad (59)$$

Once a solution  $\pi$  of the static SBP is on hand, we want to utilise the stochastic regression objective on the conditional score and flow. Sampling  $(x_0, x_t)$  from  $\pi$ , recall that  $P^{(x_0, x_1)} = Q^{(x_0, x_1)}$  so we want to sample from the  $Q$ -bridge using (11), (12):

$$t \sim U[0, 1], \quad x_t^{(x_0, x_1)} \sim \mathcal{N}(\mu_t|(x_0, x_1), \Sigma_t|(x_0, x_1)). \quad (60)$$

Equations (9) and (12) give us the score and flow at  $x_t$ .

#### A.4 Characterisation of the $Q$ -GSB (Theorem 3)

We will construct the  $Q$ -GSB utilising its characterisation (2). Our approach is similar to that of [5] – we first obtain explicit formulae for the static  $Q$ -GSB (SBP-static) and then build towards the dynamical  $Q$ -GSB (SBP-dyn) by using the characterisation of  $Q$ -bridges.

**Static  $Q$ -GSB** The standard Gaussian EOT problem has a well known solution [30, 20, 5, 21]. Here we use the notations of [20] and define

$$\text{OT}_{\sigma^2}^{\otimes}(\alpha, \beta) := \min_{\pi \in \Pi(\alpha, \beta)} \frac{1}{2} \int \|x - y\|_2^2 d\pi(x, y) + \sigma^2 H(\pi | \alpha \otimes \beta), \quad (61)$$

where  $\sigma > 0$  is the regularisation level and  $\alpha = \mathcal{N}(a, A)$  and  $\beta = \mathcal{N}(b, B)$ . The solution to (61) in the Gaussian case is given by [20, Theorem 1]

$$\text{OT}_{\sigma^2}^{\otimes}(\alpha, \beta) = \frac{1}{2} \|a - b\|_2^2 + \frac{1}{2} B_{\sigma^2}^{\otimes}(A, B) \quad (62)$$

$$B_{\sigma^2}^{\otimes}(A, B) = \text{tr}(A) + \text{tr}(B) - 2\text{tr}(C) + \sigma^2 \log \det \left( \frac{1}{\sigma^2} C + I \right), \quad (63)$$

$$C = A^{1/2} \left( A^{1/2} B A^{1/2} + \frac{\sigma^4}{4} I \right)^{1/2} A^{-1/2} - \frac{\sigma^2}{2} I. \quad (64)$$

We are, of course, interested in a slightly different problem, namely, for  $\rho_0 = \mathcal{N}(a, A)$  and  $\rho_T = \mathcal{N}(b, B)$ , we seek to solve  $\min_{\pi \in \Pi(\rho_0, \rho_T)} \text{KL}(\pi | Q_{0,T})$ . Expanding the definition of KL and simplifying, we get

$$(\text{SBP-static}) = \min_{\pi \in \Pi(\rho_0, \rho_T)} \int d\pi \log \left( \frac{d\pi}{dQ_{0,T}} \right) \quad (65)$$

$$= \min_{\pi \in \Pi(\rho_0, \rho_T)} - \int d\pi \log \left( \frac{dQ_{0,T}}{dx_0 \otimes dx_T} \right) + H(\pi | \rho_0 \otimes \rho_T) + H(\rho_0 | dx_0) + H(\rho_T | dx_T) \quad (66)$$

$$\simeq \min_{\pi \in \Pi(\rho_0, \rho_T)} - \int d\pi \log \left( \frac{dQ_{0,T}}{dx_0 \otimes dx_T} \right) + H(\pi | \rho_0 \otimes \rho_T) \quad (67)$$

$$\simeq \min_{\pi \in \Pi(\rho_0, \rho_T)} - \int d\pi(x_0, x_T) \log \left( \frac{dQ_{T|0}(x_T | x_0)}{dx_T} \right) + H(\pi | \rho_0 \otimes \rho_T) \quad (68)$$

where by  $\simeq$  we denote equality of the objective up to additive constants which do not affect the minimiser  $\pi$ . We note that the last line is exactly (61) with  $\alpha, \beta = \rho_0, \rho_T$  and  $\sigma = 1$  and a modified cost. Further, recognise  $dQ_{T|0}(x_T | x_0)/dx_T$  as the  $Q$ -transition density, and  $Q_{T|0} = \mathcal{N}(\mu_T^{x_0}, \Sigma_T)$ . Thus,

$$(\text{SBP-static}) \simeq \min_{\pi \in \Pi(\rho_0, \rho_T)} \frac{1}{2} \int (x_T - \mu_T^{x_0})^\top \Sigma_T^{-1} (x_T - \mu_T^{x_0}) d\pi(x_0, x_T) + H(\pi | \rho_0 \otimes \rho_T) \quad (69)$$

where we remind that  $\mu_t^{x_0}$  is the mean at time  $t$  conditional on starting at  $(0, x_0)$ , and  $\Sigma_t$  is the covariance at time  $t$ , started at a point mass, i.e.  $\Sigma_0 = 0$ .

In particular, we have  $\Sigma_t = \Phi_t$ , using the notation of Theorem 2. Recall that in the case of constant coefficients, we have the following explicit expressions:

$$\mu_t^{x_0} = e^{tA}(x_0 - m) + m, \quad (70)$$

$$\Phi_t = \int_0^t e^{(t-s)A} \sigma \sigma^\top e^{(t-s)A^\top} ds. \quad (71)$$

551 Define the following changes of variable  $(\mathbf{x}_0, \mathbf{x}_T) \mapsto (\bar{\mathbf{x}}_0, \bar{\mathbf{x}}_T)$ , injective whenever  $\Sigma_T$  is positive  
 552 definite:

$$\begin{aligned}\bar{\mathbf{x}}_0 &= T_0(\mathbf{x}_0) = \Sigma_T^{-1/2} \boldsymbol{\mu}_T^{\mathbf{x}_0}, \\ \bar{\mathbf{x}}_T &= T_T(\mathbf{x}_T) = \Sigma_T^{-1/2} \mathbf{x}_T\end{aligned}$$

553 Let  $\bar{\rho}_0 = (T_0)_\# \rho_0$  and  $\bar{\rho}_T = (T_T)_\# \rho_T$ , and  $\bar{\pi} = (T_0 \times T_T)_\# \pi$  and note that the relative entropy is  
 554 invariant to this change of coordinates. So the problem (69) is equivalent to

$$\min_{\bar{\pi} \in \Pi(\bar{\rho}_0, \bar{\rho}_T)} \frac{1}{2} \int \|\bar{\mathbf{x}}_T - \bar{\mathbf{x}}_0\|_2^2 d\bar{\pi}(\bar{\mathbf{x}}_0, \bar{\mathbf{x}}_T) + H(\bar{\pi} | \bar{\rho}_0 \otimes \bar{\rho}_T). \quad (72)$$

555 This is exactly  $\text{OT}_{\sigma^2=1}^\otimes(\bar{\rho}_0, \bar{\rho}_T)$  as per (61) with  $\bar{\rho}_0 = \mathcal{N}(\bar{\mathbf{a}}, \bar{\mathbf{A}})$  and  $\bar{\rho}_T = \mathcal{N}(\bar{\mathbf{b}}, \bar{\mathbf{B}})$ . The transformed  
 556 means and covariances are

$$\begin{aligned}\bar{\mathbf{a}} &= \Sigma_T^{-1/2} (e^{TA}(\mathbf{a} - \mathbf{m}) + \mathbf{m}) \\ \bar{\mathbf{A}} &= \Sigma_T^{-1/2} e^{TA} \mathbf{A} e^{TA^\top} \Sigma_T^{-1/2} \\ \bar{\mathbf{b}} &= \Sigma_T^{-1/2} \mathbf{b} \\ \bar{\mathbf{B}} &= \Sigma_T^{-1/2} \mathbf{B} \Sigma_T^{-1/2}\end{aligned}$$

557 We remark that for time-dependent coefficients our approach still applies, however computation of  
 558 the transformation coefficients will be in terms of the general state transition matrix instead of matrix  
 559 exponentials. In what follows, we focus on results for constant coefficients for simplicity and their  
 560 practical relevance.

561 The solution to (72) is therefore

$$(\bar{\mathbf{x}}_0, \bar{\mathbf{x}}_T) \sim \bar{\pi} = \mathcal{N}\left(\begin{bmatrix} \bar{\mathbf{a}} \\ \bar{\mathbf{b}} \end{bmatrix}, \begin{bmatrix} \bar{\mathbf{A}} & \bar{\mathbf{C}} \\ \bar{\mathbf{C}}^\top & \bar{\mathbf{B}} \end{bmatrix}\right),$$

562 where  $\bar{\mathbf{C}}$  is the cross-covariance the transport plan, given by (64).

563 **Dynamic  $\mathbb{Q}$ -GSB : marginals and covariance** Let  $X_t | (x_0, x_T)$  denote the  $\mathbb{Q}$ -bridge pinned at  
 564  $(x_0, x_T)$ . Then by Theorem 2,

$$X_t | (x_0, x_T) = \mathcal{N}(\boldsymbol{\mu}_{t|(x_0, x_T)}, \Sigma_{t|(x_0, x_T)}) = \mathcal{N}(\boldsymbol{\mu}_{t|(x_0, x_T)}, \Omega_t).$$

565 Invoking the inverse mappings  $T_0^{-1}, T_T^{-1}$  and substituting the expression for  $\boldsymbol{\mu}_{t|(x_0, x_T)}$  from 2, we  
 566 get

$$\boldsymbol{\mu}_{t|(T_0^{-1}(\bar{\mathbf{x}}_0), T_T^{-1}(\bar{\mathbf{x}}_T))} = \underbrace{\left(e^{-(T-t)\mathbf{A}} - \Gamma_t\right) \Sigma_T^{1/2} \bar{\mathbf{x}}_0}_{\mathfrak{A}_t} + \underbrace{\Gamma_t \Sigma_T^{1/2} \bar{\mathbf{x}}_T}_{\mathfrak{B}_t} + \underbrace{\left(\mathbf{I} - e^{-(T-t)\mathbf{A}}\right) \mathbf{m}}_{\mathfrak{C}_t} \quad (73)$$

$$= \mathfrak{A}_t \bar{\mathbf{x}}_0 + \mathfrak{B}_t \bar{\mathbf{x}}_T + \mathfrak{C}_t. \quad (74)$$

567 where  $\Gamma_t = \Phi_t e^{(T-t)\mathbf{A}^\top} \Phi_T^{-1}$ . For clarity, we state first a general formula:

568 **Lemma 1.** Let  $(X_0, X_1) \sim \mathcal{N}\left(\begin{bmatrix} \boldsymbol{\mu}_0 \\ \boldsymbol{\mu}_1 \end{bmatrix}, \begin{bmatrix} \Sigma_{00} & \Sigma_{01} \\ \Sigma_{10} & \Sigma_{11} \end{bmatrix}\right)$ . Let

$$Y_{X_0, X_1} \sim \mathcal{N}(\mathbf{A}X_0 + \mathbf{B}X_1 + \mathbf{c}, \Omega).$$

569 Then,  $\mathbb{E}[Y] = \mathbf{A}\boldsymbol{\mu}_0 + \mathbf{B}\boldsymbol{\mu}_1 + \mathbf{c}$  and  $\mathbb{V}[Y] = \Omega + \mathbf{A}\Sigma_{00}\mathbf{A}^\top + \mathbf{B}\Sigma_{11}\mathbf{B}^\top + \mathbf{A}\Sigma_{01}\mathbf{B}^\top + \mathbf{B}\Sigma_{01}^\top\mathbf{A}^\top$ .

570 Application to (74) gives us the following formula for the variance of the bridge at time  $t$ :

$$\mathbb{V}[X_t] = \Omega_t + \mathfrak{A}_t \bar{\mathbf{A}} \mathfrak{A}_t^\top + \mathfrak{B}_t \bar{\mathbf{B}} \mathfrak{B}_t^\top + \mathfrak{A}_t \bar{\mathbf{C}} \mathfrak{B}_t^\top + \mathfrak{B}_t \bar{\mathbf{C}}^\top \mathfrak{A}_t^\top =: \Xi_t. \quad (75)$$

571 Substituting and simplifying, we get the following expressions for each of the terms:

$$\mathfrak{A}_t \bar{\mathbf{A}} \mathfrak{A}_t^\top = (\mathbf{I} - \Gamma_t e^{(T-t)\mathbf{A}}) e^{t\mathbf{A}} \mathbf{A} e^{t\mathbf{A}^\top} (\mathbf{I} - \Gamma_t e^{(T-t)\mathbf{A}})^\top, \quad (76)$$

$$\mathfrak{B}_t \bar{\mathbf{B}} \mathfrak{B}_t^\top = \Gamma_t \mathbf{B} \Gamma_t^\top, \quad (77)$$

$$\mathfrak{A}_t \bar{\mathbf{C}} \mathfrak{B}_t^\top = (e^{-(T-t)\mathbf{A}} - \Gamma_t) \Sigma_T^{1/2} \bar{\mathbf{C}} \Sigma_T^{1/2} \Gamma_t^\top. \quad (78)$$

572 Similarly, the mean can be computed as

$$\mathbb{E}[\mathbf{X}_t] = \mathbf{A}_t \bar{\mathbf{a}} + \mathbf{B}_t \bar{\mathbf{b}} + \mathbf{c}_t \quad (79)$$

$$= \left( e^{-(T-t)\mathbf{A}} - \mathbf{\Gamma}_t \right) e^{T\mathbf{A}} (\mathbf{a} - \mathbf{m}) + \mathbf{\Gamma}_t (\mathbf{b} - \mathbf{m}) + \mathbf{m} =: \boldsymbol{\nu}_t. \quad (80)$$

573 To calculate the covariance of the SB process, we use again the disintegration property (2). We have  
574 from (52) for the  $\mathbb{Q}$ -bridges and  $0 < s < t < T$ :

$$\mathbb{V}[\mathbf{X}_s, \mathbf{X}_t | \mathbf{X}_0, \mathbf{X}_T] = \mathbf{\Phi}_s e^{(t-s)\mathbf{A}^\top} - \mathbf{\Phi}_s e^{(T-s)\mathbf{A}^\top} \mathbf{\Phi}_T^{-1} e^{(T-t)\mathbf{A}} \mathbf{\Phi}_t =: \boldsymbol{\Omega}_{s,t}. \quad (81)$$

575 Now,

$$\mathbb{V}[\mathbf{X}_s, \mathbf{X}_t] = \mathbb{E}[(\mathbf{X}_s - \boldsymbol{\nu}_s)(\mathbf{X}_t - \boldsymbol{\nu}_t)^\top] \quad (82)$$

$$= \mathbb{E}[\mathbf{X}_s \mathbf{X}_t^\top] - \boldsymbol{\nu}_s \boldsymbol{\nu}_t^\top \quad (83)$$

$$= \mathbb{E}[\mathbb{E}[\mathbf{X}_s \mathbf{X}_t^\top | \mathbf{X}_0, \mathbf{X}_T]] - \boldsymbol{\nu}_s \boldsymbol{\nu}_t^\top. \quad (84)$$

576 and

$$\mathbb{E}[\mathbf{X}_s \mathbf{X}_t^\top | \mathbf{X}_0, \mathbf{X}_T] = \mathbb{V}[\mathbf{X}_s, \mathbf{X}_t | \mathbf{X}_0, \mathbf{X}_T] + \boldsymbol{\mu}_{s|(\mathbf{X}_0, \mathbf{X}_T)} \boldsymbol{\mu}_{t|(\mathbf{X}_0, \mathbf{X}_T)}^\top, \quad (85)$$

577 in which the first (variance) term doesn't actually depend on  $(\mathbf{X}_0, \mathbf{X}_T)$ . So,

$$\mathbb{E}[\mathbf{X}_s \mathbf{X}_t^\top] = \boldsymbol{\Omega}_{st} + \mathbb{E}_{(\mathbf{X}_0, \mathbf{X}_T)} [\boldsymbol{\mu}_{s|(\mathbf{X}_0, \mathbf{X}_T)} \boldsymbol{\mu}_{t|(\mathbf{X}_0, \mathbf{X}_T)}^\top]. \quad (86)$$

578 In fact let's switch to the "mapped" coordinates  $\bar{\mathbf{X}}_0, \bar{\mathbf{X}}_T$  for the endpoints. We abuse notation and  
579 omit the inverse map in what follows. Then, from previously,

$$\boldsymbol{\mu}_{t|(\bar{\mathbf{X}}_0, \bar{\mathbf{X}}_T)} = \mathbf{A}_t \bar{\mathbf{X}}_0 + \mathbf{B}_t \bar{\mathbf{X}}_T + \mathbf{c}_t. \quad (87)$$

580 Expanding, collecting and cancelling terms, we have that

$$\mathbb{E}[\boldsymbol{\mu}_{s|(\bar{\mathbf{X}}_0, \bar{\mathbf{X}}_T)} \boldsymbol{\mu}_{t|(\bar{\mathbf{X}}_0, \bar{\mathbf{X}}_T)}^\top] - \boldsymbol{\nu}_s \boldsymbol{\nu}_t^\top = \mathbf{A}_s \mathbb{V}[\bar{\mathbf{X}}_0] \mathbf{A}_t^\top + \mathbf{A}_s \mathbb{V}[\bar{\mathbf{X}}_0, \bar{\mathbf{X}}_T] \mathbf{B}_t^\top + \mathbf{B}_s \mathbb{V}[\bar{\mathbf{X}}_T, \bar{\mathbf{X}}_0] \mathbf{A}_t^\top + \mathbf{B}_s \mathbb{V}[\bar{\mathbf{X}}_T] \mathbf{B}_t^\top \quad (88)$$

$$= \mathbf{A}_s \bar{\mathbf{A}} \mathbf{A}_t^\top + \mathbf{A}_s \bar{\mathbf{C}} \mathbf{B}_t^\top + \mathbf{B}_s \bar{\mathbf{C}}^\top \mathbf{A}_t^\top + \mathbf{B}_s \bar{\mathbf{B}} \mathbf{B}_t^\top. \quad (89)$$

581 Putting everything together, we get

$$\mathbb{V}[\mathbf{X}_s, \mathbf{X}_t] = \boldsymbol{\Omega}_{st} + \mathbf{A}_s \bar{\mathbf{A}} \mathbf{A}_t^\top + \mathbf{A}_s \bar{\mathbf{C}} \mathbf{B}_t^\top + \mathbf{B}_s \bar{\mathbf{C}}^\top \mathbf{A}_t^\top + \mathbf{B}_s \bar{\mathbf{B}} \mathbf{B}_t^\top =: \boldsymbol{\Xi}_{s,t}. \quad (90)$$

582 **Dynamic  $\mathbb{Q}$ -GSB : SDE representation** We proceed via the generator route also used by [5].

583 Expanding the covariance (90), we find that

$$\mathbb{V}[\mathbf{X}_t, \mathbf{X}_{t+h}] = \boldsymbol{\Xi}_{t,t+h} = \boldsymbol{\Omega}_{t,t+h} + \mathbf{A}_t \bar{\mathbf{A}} \mathbf{A}_{t+h}^\top + \mathbf{A}_t \bar{\mathbf{C}} \mathbf{B}_{t+h}^\top + \mathbf{B}_t \bar{\mathbf{C}}^\top \mathbf{A}_{t+h}^\top + \mathbf{B}_t \bar{\mathbf{B}} \mathbf{B}_{t+h}^\top \quad (91)$$

$$= \boldsymbol{\Xi}_t + h \left\{ (\partial_{t'} \boldsymbol{\Omega}_{t,t'})(t) + \mathbf{A}_t \bar{\mathbf{A}} \dot{\mathbf{A}}_t^\top + \mathbf{A}_t \bar{\mathbf{C}} \dot{\mathbf{B}}_t^\top + \mathbf{B}_t \bar{\mathbf{C}}^\top \dot{\mathbf{A}}_t^\top + \mathbf{B}_t \bar{\mathbf{B}} \dot{\mathbf{B}}_t^\top \right\} + \dots \quad (92)$$

$$= \boldsymbol{\Xi}_t + h \mathbf{S}_t + \dots \quad (93)$$

584 where we have set the key quantity

$$\mathbf{S}_t = (\partial_{t'} \boldsymbol{\Omega}_{t,t'})(t) + \mathbf{A}_t \bar{\mathbf{A}} \dot{\mathbf{A}}_t^\top + \mathbf{A}_t \bar{\mathbf{C}} \dot{\mathbf{B}}_t^\top + \mathbf{B}_t \bar{\mathbf{C}}^\top \dot{\mathbf{A}}_t^\top + \mathbf{B}_t \bar{\mathbf{B}} \dot{\mathbf{B}}_t^\top \quad (94)$$

585 Now,  $(\mathbf{X}_{t+h}, \mathbf{X}_t)$  are jointly Gaussian with mean and covariance

$$\begin{bmatrix} \boldsymbol{\nu}_{t+h} \\ \boldsymbol{\nu}_t \end{bmatrix}, \begin{bmatrix} \boldsymbol{\Xi}_{t+h} & \boldsymbol{\Xi}_{t+h,t} \\ \boldsymbol{\Xi}_{t,t+h} & \boldsymbol{\Xi}_t \end{bmatrix}. \quad (95)$$

586 So

$$\mathbb{E}[\mathbf{X}_{t+h} | \mathbf{X}_t] = \boldsymbol{\nu}_{t+h} + \boldsymbol{\Xi}_{t,t+h}^\top \boldsymbol{\Xi}_t^{-1} (\mathbf{X}_t - \boldsymbol{\nu}_t) \quad (96)$$

$$= \mathbf{X}_t + h [\dot{\boldsymbol{\nu}}_t + \mathbf{S}_t^\top \boldsymbol{\Xi}_t^{-1} (\mathbf{X}_t - \boldsymbol{\nu}_t)] \quad (97)$$

$$\mathbb{V}[\mathbf{X}_{t+h} | \mathbf{X}_t] = \boldsymbol{\Xi}_{t+h} - \boldsymbol{\Xi}_{t,t+h}^\top \boldsymbol{\Xi}_t^{-1} \boldsymbol{\Xi}_{t,t+h} \quad (98)$$

$$= h(\dot{\mathbf{S}}_t - (\mathbf{S}_t + \mathbf{S}_t^\top)). \quad (99)$$

587 Let  $\mathbf{x} \mapsto u(\mathbf{x})$  be a twice differentiable test function. Then:

$$\mathbb{E}[u(\mathbf{X}_{t+h})|\mathbf{X}_t = \mathbf{x}] = \mathbb{E}\left[u(\mathbf{X}_t) + (\partial_x u(\mathbf{X}_t))^\top (\mathbf{X}_{t+h} - \mathbf{X}_t) + \frac{1}{2}(\mathbf{X}_{t+h} - \mathbf{X}_t)^\top (\partial_{xx}^2 u(\mathbf{X}_t))(\mathbf{X}_{t+h} - \mathbf{X}_t) \middle| \mathbf{X}_t = \mathbf{x}\right] \quad (100)$$

$$= u(\mathbf{x}) + h(\partial_x u(\mathbf{x}))^\top (\dot{\nu}_t + \mathbf{S}_t^\top \Xi_t^{-1}(\mathbf{x} - \nu_t)) + \frac{1}{2}\mathbb{E}\left[(\mathbf{X}_{t+h} - \mathbf{X}_t)^\top (\partial_{xx}^2 u(\mathbf{X}_t))(\mathbf{X}_{t+h} - \mathbf{X}_t) \middle| \mathbf{X}_t = \mathbf{x}\right] \quad (101)$$

$$= u(\mathbf{x}) + h(\partial_x u(\mathbf{x}))^\top (\dot{\nu}_t + \mathbf{S}_t^\top \Xi_t^{-1}(\mathbf{x} - \nu_t)) + \frac{h}{2}\text{tr}[(\partial_{xx}^2 u(\mathbf{x}))(\dot{\Xi}_t - (\mathbf{S}_t + \mathbf{S}_t^\top))] + \dots \quad (102)$$

588 Subtracting  $u(\mathbf{x})$  and taking the limit  $h \rightarrow 0$ , it is clear from the definition of the generator that the  
589 SDE drift is

$$\dot{\nu}_t + \mathbf{S}_t^\top \Xi_t^{-1}(\mathbf{x} - \nu_t). \quad (103)$$

590 This takes the same form as the equation found in [5], however our formulae for  $\mathbf{S}_t$  allow us to apply  
591 it to any linear reference SDE, not necessarily ones with scalar drift. Additionally, we empirically  
592 verify that for asymmetric  $\mathbf{A}$  the matrix  $\mathbf{S}_t$  is asymmetric. This contrasts with the symmetric nature  
593 of the drift for the gradient-type setting.

594 Now we want to work out what each of these terms are in practice. Effectively we need to compute  
595  $\dot{\mathfrak{A}}_t$ ,  $\dot{\mathfrak{B}}_t$  and  $(\partial_{t'} \Omega_{t,t'})(t)$ :

$$\dot{\mathfrak{A}}_t = (\mathbf{A}e^{-(T-t)\mathbf{A}} - \dot{\Gamma}_t)\Sigma_T^{1/2}, \quad (104)$$

$$\dot{\mathfrak{B}}_t = \dot{\Gamma}_t \Sigma_T^{1/2}, \quad (105)$$

$$\dot{\Gamma}_t = \left(e^{t\mathbf{A}}\boldsymbol{\sigma}\boldsymbol{\sigma}^\top e^{T\mathbf{A}^\top} - \Phi_t \mathbf{A}^\top e^{(T-t)\mathbf{A}^\top}\right) \Phi_T^{-1}, \quad (106)$$

$$(\partial_{t'} \Omega_{t,t'})(t) = \Phi_t \left[ \mathbf{A}^\top - e^{(T-t)\mathbf{A}^\top} \Phi_T^{-1} e^{(T-t)\mathbf{A}} \left( -\mathbf{A}\Phi_t + e^{t\mathbf{A}}\boldsymbol{\sigma}\boldsymbol{\sigma}^\top e^{t\mathbf{A}^\top} \right) \right]. \quad (107)$$

596 **Remark on the case of time-varying coefficients** In this case we can still assume without loss of  
597 generality that we still work on the time interval  $[0, T]$ , by shifting the time coordinate if necessary.  
598 Let  $\Psi(t, s)$  be the state transition matrix associated with  $\mathbf{A}_t$  and  $\Phi_t$  be the solution at time  $t$  to (53).  
599 Then we still have  $\Sigma_T = \Phi_T$  for the transition kernel covariance in the cost, i.e. the covariance  
600 started from a point mass. For the mean of the reference process started from  $\mathbf{x}_0$ , we have the  
601 generalised formula

$$\boldsymbol{\mu}_t(\mathbf{x}_0) = \Psi(t, 0)\mathbf{x}_0 - \int_0^t \Psi(t, s)\mathbf{A}_s \mathbf{m}_s \, ds, \quad (108)$$

602 and we remark that its inverse  $\boldsymbol{\mu}_t^{-1}$  always exists since  $\Psi$  is never singular:

$$\boldsymbol{\mu}_t^{-1}(\mathbf{y}) = \Psi(t, 0)^{-1} \left( \mathbf{y} + \int_0^t \Psi(t, s)\mathbf{A}_s \mathbf{m}_s \, ds \right). \quad (109)$$

603 Then

$$\bar{\mathbf{a}} = \Sigma_T^{-1/2} \boldsymbol{\mu}_T^{\mathbf{a}}, \quad (110)$$

$$\bar{\mathcal{A}} = \Sigma_T^{-1/2} \Psi(t, 0) \mathbf{A} \Psi(t, 0)^\top \Sigma_T^{-1/2}, \quad (111)$$

$$\bar{\mathbf{b}} = \Sigma_T^{-1/2} \mathbf{b}, \quad (112)$$

$$\bar{\mathcal{B}} = \Sigma_T^{-1/2} \mathcal{B} \Sigma_T^{-1/2}. \quad (113)$$

604 Recall that the general expression for the  $\mathbb{Q}$ -bridge conditioned on  $(0, \mathbf{x}_0), (T, \mathbf{x}_T)$  is

$$\boldsymbol{\mu}_{t|(\mathbf{x}_0, \mathbf{x}_1)} = \boldsymbol{\mu}_t(\mathbf{x}_0) + \Phi_t \Psi(T, t)^\top \Phi_T^{-1}(\mathbf{x}_T - \boldsymbol{\mu}_T(\mathbf{x}_0)). \quad (114)$$



605 Letting  $\mathbf{x}_0 = \boldsymbol{\mu}_T^{-1}(\boldsymbol{\Sigma}_T^{1/2}\bar{\mathbf{x}}_0)$  and  $\mathbf{x}_T = \boldsymbol{\Sigma}_T^{1/2}\bar{\mathbf{x}}_T$  and substituting the expression for  $\boldsymbol{\mu}_t^{-1}$  we have

$$\begin{aligned} \boldsymbol{\mu}_{t|(T_0^{-1}(\bar{\mathbf{x}}_0), T_T^{-1}(\bar{\mathbf{x}}_T))} &= (\boldsymbol{\Psi}(t, T) - \boldsymbol{\Phi}_t \boldsymbol{\Psi}(T, t)^\top \boldsymbol{\Phi}_T^{-1}) \boldsymbol{\Sigma}_T^{1/2} \bar{\mathbf{x}}_0 \\ &\quad + \boldsymbol{\Phi}_t \boldsymbol{\Psi}(T, t)^\top \boldsymbol{\Phi}_T^{-1} \boldsymbol{\Sigma}_T^{1/2} \bar{\mathbf{x}}_T \\ &\quad + \int_t^T \boldsymbol{\Psi}(t, s) \mathbf{A}_s \mathbf{m}_s ds. \end{aligned} \quad (115)$$

606 Set  $\boldsymbol{\Gamma}_t = \boldsymbol{\Phi}_t \boldsymbol{\Psi}(T, t)^\top \boldsymbol{\Phi}_T^{-1}$ , then

$$\mathbf{A}_t = (\boldsymbol{\Psi}(t, T) - \boldsymbol{\Gamma}_t) \boldsymbol{\Sigma}_T^{1/2}, \quad (116)$$

$$\mathbf{B}_t = \boldsymbol{\Gamma}_t \boldsymbol{\Sigma}_T^{1/2}, \quad (117)$$

$$\mathbf{C}_t = \int_t^T \boldsymbol{\Psi}(t, s) \mathbf{A}_s \mathbf{m}_s ds. \quad (118)$$

607 **Case: Brownian motion** Let's check this against the results of Bunne and Hsieh [5], who consider  
608 a class of reference processes

$$d\mathbf{Y}_t = (c_t \mathbf{Y}_t + \alpha_t) dt + g_t d\mathbf{B}_t.$$

609 This corresponds to a special case of ours, where the drift is scalar-valued. Setting  $g_t = \omega$ ,  $\alpha_t = c_t =$   
610  $0$ , their results give us the marginal parameters of the GSB connecting  $\mathcal{N}(\boldsymbol{\mu}_0, \boldsymbol{\Sigma}_0)$  and  $\mathcal{N}(\boldsymbol{\mu}_1, \boldsymbol{\Sigma}_1)$ .  
611 In what follows, using their results and notations of [5 Table 1], we have that  $r_t = t$ ,  $\bar{r}_t = 1 - t$ ,  $\zeta =$   
612  $0$ ,  $\kappa(t, t') = \omega^2 t$ ,  $\rho_t = t$ . Then:

$$\boldsymbol{\mu}_t = \bar{r}_t \boldsymbol{\mu}_0 + r_t \boldsymbol{\mu}_1 + \zeta(t) - r_t \zeta(1), \quad (119)$$

$$= (1 - t) \boldsymbol{\mu}_0 + t \boldsymbol{\mu}_1, \quad (120)$$

$$\boldsymbol{\Sigma}_t = \bar{r}_t^2 \boldsymbol{\Sigma}_0 + r_t^2 \boldsymbol{\Sigma}_1 + r_t \bar{r}_t (\mathbf{C}_\sigma + \mathbf{C}_\sigma^\top) + \kappa(t, t') (1 - \rho_t) \mathbf{I} \quad (121)$$

$$= (1 - t)^2 \boldsymbol{\Sigma}_0 + t^2 \boldsymbol{\Sigma}_1 + t(1 - t) (\mathbf{C}_\sigma + \mathbf{C}_\sigma^\top) + \omega^2 t (1 - t) \mathbf{I}. \quad (122)$$

613 Let us compute the same quantities using our formulae. We set  $\mathbf{A} = 0$ ,  $\mathbf{m} = 0$  and  $T = 1$ . Then,  
614  $\boldsymbol{\Phi}_t = t\omega^2 \mathbf{I}$ ,  $\boldsymbol{\Gamma}_t = t \mathbf{I}$ ,  $\boldsymbol{\Sigma}_T^{1/2} = \omega \mathbf{I}$ . Then,

$$\bar{\mathbf{A}} = \omega^{-2} \mathbf{A}, \quad \bar{\mathbf{B}} = \omega^{-2} \mathbf{B}.$$

615 Also from the underbraced expressions, we have

$$\mathbf{A}_t = \omega(1 - t) \mathbf{I}, \quad \mathbf{B}_t = \omega t \mathbf{I}.$$

616 Assembling our results, we get

$$\mathbb{E}[\mathbf{X}_t] = (\mathbf{I} - \boldsymbol{\Gamma}_t) \mathbf{a} + \boldsymbol{\Gamma}_t \mathbf{b}$$

$$= (1 - t) \mathbf{a} + t \mathbf{b}$$

$$\mathbb{V}[\mathbf{X}_t] = \boldsymbol{\Omega}_t + \mathbf{A}_t \bar{\mathbf{A}} \mathbf{A}_t^\top + \mathbf{B}_t \bar{\mathbf{B}} \mathbf{B}_t^\top + \mathbf{A}_t \bar{\mathbf{C}} \mathbf{B}_t^\top + \mathbf{B}_t \bar{\mathbf{C}} \mathbf{A}_t^\top$$

$$= \boldsymbol{\Omega}_t + (1 - t)^2 \mathbf{A} + t^2 \mathbf{B} + \omega^2 t (1 - t) (\bar{\mathbf{C}} + \bar{\mathbf{C}}^\top).$$

617 Now  $\bar{\mathbf{C}}$  is the transport plan obtained from the *scaled* input Gaussians, of variance  $\bar{\mathbf{A}} = \mathbf{A}/\omega^2$ ,  $\bar{\mathbf{B}} =$   
618  $\mathbf{B}/\omega^2$  (in the case of Brownian reference process, there is no linear mapping via the flow map). For  
619 the scaled measures, EOT is calculated with  $\varepsilon = \sigma^2 = 1$ . It stands to reason that once we scale  
620 everything back, we should get  $\bar{\mathbf{C}} = \mathbf{C}/\omega^2$ . To verify this, recall that for the untransformed problem

$$\arg \min_{\pi \in \Pi(\alpha, \beta)} \frac{1}{2} \int \frac{1}{\omega^2} \|x - y\|^2 d\pi + \mathbb{H}(\pi | \alpha \otimes \beta) = \arg \min_{\pi \in \Pi(\alpha, \beta)} \frac{1}{2} \int \|x - y\|^2 d\pi + \omega^2 \mathbb{H}(\pi | \alpha \otimes \beta).$$

621 Then for the RHS problem, we have that

$$\begin{aligned} \mathbf{C} &= \mathbf{A}^{1/2} (\mathbf{A}^{1/2} \mathbf{B} \mathbf{A}^{1/2} - \frac{\omega^4}{4} \mathbf{I})^{1/2} \mathbf{A}^{-1/2} - \frac{\omega^2}{2} \mathbf{I} \\ &= \omega^2 (\bar{\mathbf{A}}^{1/2} (\bar{\mathbf{A}}^{1/2} \bar{\mathbf{B}} \bar{\mathbf{A}}^{1/2} + \frac{1}{4} \mathbf{I})^{1/2} \bar{\mathbf{A}}^{-1/2} - \frac{1}{2} \mathbf{I}) \\ &= \omega^2 \bar{\mathbf{C}}. \end{aligned}$$

Also it is easy to verify that  $\Omega_t = \Sigma_{t|(x_0, x_1)} = \omega^2 t(1-t)\mathbf{I}$ . So,

$$\mathbb{V}[\mathbf{X}_t] = \omega^2 t(1-t)\mathbf{I} + (1-t)^2 \mathbf{A} + t^2 \mathbf{B} + t(1-t)(\mathbf{C} + \mathbf{C}^\top), \quad (123)$$

where  $\mathbf{C}$  is the EOT plan between the unscaled measures  $\mathcal{N}(\mathbf{a}, \mathbf{A}), \mathcal{N}(\mathbf{b}, \mathbf{B})$  with  $\varepsilon = \omega^2$ . This is exactly the same result as the one derived in [5].

**Case: Centered scalar OU process  $\mathbf{A} = -\lambda\mathbf{I}, \mathbf{m} = \mathbf{0}$**  From [5] Table 1], we have that  $\bar{r}_t = \sinh(\lambda t)/\sinh(\lambda), \bar{r}_t = \sinh(\lambda t) \coth(\lambda) - \sinh(\lambda) \coth(\lambda), \zeta = 0$ . The mean is then

$$\boldsymbol{\mu}_t = \bar{r}_t \boldsymbol{\mu}_0 + r_t \boldsymbol{\mu}_1. \quad (124)$$

With  $\kappa(t, t') = \omega^2 e^{-\lambda t} \sinh(\lambda t)/\lambda$  and  $\rho_t = e^{-\lambda(1-t)} \sinh(\lambda t)/\sinh(\lambda)$ , the variance is

$$\Sigma_t = \bar{r}_t^2 \Sigma_0 + r_t \Sigma_1 + r_t \bar{r}_t (\mathbf{C}_{\sigma^*} + \mathbf{C}_{\sigma^*}^\top) + \kappa(t, t)(1 - \rho_t)\mathbf{I}, \quad (125)$$

where  $\sigma^{*2} = \omega^2 \sinh(\lambda)/\lambda$ . For convenience, we will check things term by term and using Mathematica.

Check first the mean. We have:

$$\Phi_t = \omega^2 \left( \frac{1 - e^{-2\lambda t}}{2\lambda} \right) \mathbf{I}, \quad \Gamma_t = e^{-(1-t)\lambda} \left( \frac{1 - e^{-2\lambda}}{1 - e^{-2\lambda}} \right) \mathbf{I} \quad (126)$$

Then, plugging into our formula,

$$\mathbb{E}[\mathbf{X}_t] = \underbrace{e^{-\lambda}(e^{(1-t)\lambda}\mathbf{I} - \Gamma_t)}_{=\bar{r}_t} \mathbf{a} + \underbrace{\Gamma_t}_{=r_t} \mathbf{b}. \quad (127)$$

Now the variance. We have that

$$\Sigma_1 = \omega^2 \left( \frac{e^{-\lambda} \sinh(\lambda)}{\lambda} \right) \mathbf{I}, \quad (128)$$

$$\bar{\mathbf{A}} = \frac{\lambda e^{-\lambda}}{\omega^2 \sinh(\lambda)} \mathbf{A} = \alpha \mathbf{A}, \quad (129)$$

$$\bar{\mathbf{B}} = \frac{\lambda}{\omega^2 e^{-\lambda} \sinh(\lambda)} \mathbf{B} = \beta \mathbf{B}, \quad (130)$$

$$\mathfrak{A}_t = (e^{(1-t)\lambda} \mathbf{I} - \Gamma_t) \Sigma_1^{1/2}, \quad (131)$$

$$\mathfrak{B}_t = \Gamma_t \Sigma_1^{1/2}. \quad (132)$$

From here it is straightforward to verify that

$$\mathfrak{A}_t \bar{\mathbf{A}} \mathfrak{A}_t^\top = \bar{r}_t^2 \mathbf{A}, \quad \mathfrak{B}_t \bar{\mathbf{B}} \mathfrak{B}_t^\top = r_t^2 \mathbf{B}. \quad (133)$$

Now note that

$$\bar{\mathbf{C}} = \bar{\mathbf{A}}^{1/2} \left( \bar{\mathbf{A}}^{1/2} \bar{\mathbf{B}} \bar{\mathbf{A}}^{1/2} + \frac{1}{4} \mathbf{I} \right)^{1/2} \bar{\mathbf{A}}^{-1/2} - \frac{1}{2} \mathbf{I} \quad (134)$$

$$= \sqrt{\alpha\beta} \left[ \mathbf{A}^{1/2} \left( \mathbf{A}^{1/2} \mathbf{B} \mathbf{A}^{1/2} + \frac{(\alpha\beta)^{-1}}{4} \mathbf{I} \right)^{1/2} \mathbf{A}^{-1/2} - \frac{(\alpha\beta)^{-1/2}}{2} \mathbf{I} \right] \quad (135)$$

$$= \sqrt{\alpha\beta} \mathbf{C}_{1/\sqrt{\alpha\beta}}, \quad (136)$$

where  $\mathbf{C}_{1/\sqrt{\alpha\beta}}$  denotes the EOT covariance for entropic regularisation level  $1/\sqrt{\alpha\beta}$ . Then:

$$\mathfrak{A}_t \bar{\mathbf{C}} \mathfrak{B}_t^\top + \mathfrak{B}_t \bar{\mathbf{C}}^\top \mathfrak{A}_t^\top = \underbrace{(e^{\lambda(1-t)} \mathbf{I} - \Gamma_t) \Gamma_t \Sigma_1 \sqrt{\alpha\beta} (\mathbf{C}_{1/\sqrt{\alpha\beta}} + \mathbf{C}_{1/\sqrt{\alpha\beta}}^\top)}_{r_t \bar{r}_t} \quad (137)$$

It is also easy to check that

$$\frac{1}{\sqrt{\alpha\beta}} = \frac{\omega^2 \sinh(\lambda)}{\lambda}.$$

Finally,

$$\Omega_t = \Sigma_{t|(x_0, x_1)} = \Phi_t (\mathbf{I} - e^{-2\lambda(1-t)} \Phi_t \Phi_t^{-1}) = \kappa(t, t)(1 - \rho_t) \mathbf{I}. \quad (138)$$

We have verified that all the terms in the expression for the variance agree.

## 639 A.5 Proof of Theorem 4

640 *Proof.* We follow the arguments of [48] with application to the generalised Schrödinger bridge – not  
 641 much changes for  $\mathbb{Q}$  as the reference and we reproduce in detail the arguments as follows. For the  
 642 equality of gradients, it suffices to show this for the flow matching component of the loss, since the  
 643 score matching component can be handled using the exact same arguments [48]. Let  $\mathbf{u}_{t|(x_0, x_T)}$  be  
 644 the conditional flow between  $(x_0, x_T)$  and  $\mathbf{u}_t$  be the SB flow defined by

$$\mathbf{u}_t(\mathbf{x}) = \mathbb{E}_{(x_0, x_T) \sim \pi} \left[ \frac{p_{t|(x_0, x_T)}(\mathbf{x})}{p_t(\mathbf{x})} \mathbf{u}_{t|(x_0, x_T)}(\mathbf{x}) \right], \quad p_t(\mathbf{x}) = \mathbb{E}_{(x_0, x_T) \sim \pi} p_{t|(x_0, x_T)}(\mathbf{x}).$$

645 Let  $\mathbf{u}_t^\theta$  be the neural flow approximation with parameter  $\theta$ . Assuming that  $p_t(\mathbf{x}) > 0$  for all  $(t, \mathbf{x})$   
 646 we then have:

$$\nabla_\theta \mathbb{E}_{(x_0, x_T) \sim \pi} \mathbb{E}_{\mathbf{x} \sim p_{t|(x_0, x_T)}} \|\mathbf{u}_t^\theta(\mathbf{x}) - \mathbf{u}_{t|(x_0, x_T)}(\mathbf{x})\|^2 - \nabla_\theta \mathbb{E}_{\mathbf{x} \sim p_t(\mathbf{x})} \|\mathbf{u}_t^\theta(\mathbf{x}) - \mathbf{u}_t(\mathbf{x})\|^2 \quad (139)$$

$$= \nabla_\theta \mathbb{E}_{(x_0, x_T) \sim \pi} \mathbb{E}_{\mathbf{x} \sim p_{t|(x_0, x_T)}} [\|\mathbf{u}_t^\theta(\mathbf{x})\|^2 + \|\mathbf{u}_{t|(x_0, x_T)}(\mathbf{x})\|^2 - 2\langle \mathbf{u}_t^\theta(\mathbf{x}), \mathbf{u}_{t|(x_0, x_T)}(\mathbf{x}) \rangle] \quad (140)$$

$$- \nabla_\theta \mathbb{E}_{\mathbf{x} \sim p_t(\mathbf{x})} [\|\mathbf{u}_t^\theta(\mathbf{x})\|^2 + \|\mathbf{u}_t(\mathbf{x})\|^2 - 2\langle \mathbf{u}_t^\theta(\mathbf{x}), \mathbf{u}_t(\mathbf{x}) \rangle] \quad (141)$$

$$= 2\nabla_\theta \mathbb{E}_{(x_0, x_T) \sim \pi} \mathbb{E}_{\mathbf{x} \sim p_{t|(x_0, x_T)}} \langle \mathbf{u}_t^\theta(\mathbf{x}), \mathbf{u}_t(\mathbf{x}) \rangle - \langle \mathbf{u}_t^\theta(\mathbf{x}), \mathbf{u}_{t|(x_0, x_T)}(\mathbf{x}) \rangle, \quad (142)$$

647 where in the last line terms not depending on  $\theta$  are zero and we use the fact that  
 648  $\mathbb{E}_{(x_0, x_T)} \mathbb{E}_{\mathbf{x} | (x_0, x_T)} f(\mathbf{x}) = \mathbb{E}_{\mathbf{x}} f(\mathbf{x})$ . Now, using the relation between  $\mathbf{u}_t$  and  $\mathbf{u}_{t|(x_0, x_T)}$ ,

$$\mathbb{E}_{\mathbf{x} \sim p_t(\mathbf{x})} \langle \mathbf{u}_t^\theta(\mathbf{x}), \mathbf{u}_t(\mathbf{x}) \rangle = \int d p_t(\mathbf{x}) \langle \mathbf{u}_t^\theta(\mathbf{x}), \mathbf{u}_t(\mathbf{x}) \rangle \quad (143)$$

$$= \int d p_t(\mathbf{x}) \left\langle \mathbf{u}_t^\theta(\mathbf{x}), \int d\pi(x_0, x_T) \frac{p_{t|(x_0, x_T)}(\mathbf{x})}{p_t(\mathbf{x})} \mathbf{u}_{t|(x_0, x_T)}(\mathbf{x}) \right\rangle \quad (144)$$

$$= \int d\pi(x_0, x_T) \int d\mathbf{x} p_t(\mathbf{x}) \left\langle \mathbf{u}_t^\theta(\mathbf{x}), \frac{p_{t|(x_0, x_T)}(\mathbf{x})}{p_t(\mathbf{x})} \mathbf{u}_{t|(x_0, x_T)}(\mathbf{x}) \right\rangle \quad (145)$$

$$= \int d\pi(x_0, x_T) \int d p_{t|(x_0, x_T)}(\mathbf{x}) \langle \mathbf{u}_t^\theta(\mathbf{x}), \mathbf{u}_{t|(x_0, x_T)}(\mathbf{x}) \rangle \quad (146)$$

$$= \mathbb{E}_{(x_0, x_T) \sim \pi} \mathbb{E}_{\mathbf{x} \sim p_{t|(x_0, x_T)}} \langle \mathbf{u}_t^\theta(\mathbf{x}), \mathbf{u}_{t|(x_0, x_T)}(\mathbf{x}) \rangle. \quad (147)$$

649 So we conclude that the two gradients are equal. Clearly, the *unconditional* loss can be rewritten over  
 650 candidate flow and score fields  $(\hat{\mathbf{u}}, \hat{\mathbf{s}})$  as

$$(\hat{\mathbf{u}}, \hat{\mathbf{s}}) \mapsto \|\hat{\mathbf{u}} - \mathbf{u}\|_{L^2(dp_t(\mathbf{x})d\mathbf{x})}^2 + \|\lambda_t(\hat{\mathbf{s}} - \mathbf{s})\|_{L^2(dp_t(\mathbf{x})d\mathbf{x})}^2,$$

651 where we denote by  $\|h_t(\mathbf{x})\|_{L^2(dp_t(\mathbf{x})d\mathbf{x})}^2 = \int_0^1 dt \int d p_t(\mathbf{x}) \|h_t(\mathbf{x})\|_{L^2(\mathbb{R}^d)}^2$  for a test function  $h_t : [0, 1] \times \mathbb{R}^d \rightarrow \mathbb{R}^d$ . This loss is zero iff  $\hat{\mathbf{u}} = \mathbf{u}$  and  $\hat{\mathbf{s}} = \mathbf{s}$  ( $dp_t \times dt$ )-almost everywhere.

653 Let  $\mathbb{P}$  denote the law of the Schrödinger bridge as per (SBP-dyn) and write  $p_t(\mathbf{x}) = \mathbb{P}_t$  to mean its  
 654 marginal at time  $t$ . Then in (2) and for  $\mathbb{Q}$  a mvOU process (1), identifying:

- 655 •  $d\mathbb{P}_{0T}^* = \pi$  where  $\pi$  is prescribed in Proposition 1, and
- 656 •  $\mathbb{Q}_t^{x_0, x_T} = p_{t|(x_0, x_T)}(\mathbf{x})$  where  $p_{t|(x_0, x_T)}$  is defined as in Theorem 2,

657 substituting all these into (2) one has

$$p_t(\mathbf{x}) = \int d\pi(x_0, x_T) p_{t|(x_0, x_T)}(\mathbf{x}).$$

658 Consequently, there exists  $\mathbf{u}_t(\mathbf{x})$  such that  $\partial_t p_t(\mathbf{x}) = -\nabla \cdot (p_t(\mathbf{x}) \mathbf{u}_t(\mathbf{x}))$ . Writing  $\mathbf{s}_t(\mathbf{x}) =$   
 659  $\nabla_{\mathbf{x}} \log p_t(\mathbf{x})$  to be the score, recognising terms from the probability flow ODE, it follows that  
 660 that the SDE

$$d\mathbf{X}_t = (\mathbf{u}_t(\mathbf{X}_t) + D\mathbf{s}_t(\mathbf{X}_t))dt + \sigma d\mathbf{B}_t \quad (148)$$

661 generates the marginals  $p_t(\mathbf{x})$  of the Schrödinger bridge. Since  $\mathbb{P}$  is characterised as a mixture  
 662 of  $\mathbb{Q}$ -bridges, it follows that  $\mathbf{X}_t$  defined by the SDE (148) generates the Markovization of  $\mathbb{P}$  (see  
 663 Appendix B of [48]). Moreover,  $\mathbb{P}$  is the *unique* process that is both Markov and a mixture of  
 664  $\mathbb{Q}$ -bridges [26, 42].  $\square$

## 665 A.6 Additional background

666 **Hamilton-Jacobi-Bellman equation** Consider the *deterministic* control problem on  $[0, T]$ :

$$V_0(x_0) = \min_u \int_0^T C(x_t, u_t) dt + D(x_T). \quad (149)$$

667 subject to a dynamics  $\dot{x}_t = F(x_t, u_t)$ .  $V_t(x)$  is the *value* function for the problem starting at  $(t, x)$  up  
668 to the final time  $T$ . The function  $x_T \mapsto D(x_T)$  specifies a cost on the final value. The corresponding  
669 Hamilton-Jacobi-Bellman (HJB) equation [22, Section 3.11] is

$$\partial_t V_t(x) + \min_{u_t} \{ \langle \nabla_x V_t(x), F(x, u_t(x)) \rangle + C(x, u_t(x)) \} = 0, \quad (150)$$

670 subject to the final boundary condition  $V_T(x) = D(x)$ . A heuristic derivation is as follows. Consid-  
671 ering a time interval  $(t, t + \delta t)$  and a path  $x_t$ , it's clear that

$$V_t(x_t) = \min_u \left\{ \int_t^{t+\delta t} C(x_s, u_s) ds + V_{t+\delta t}(x_{t+\delta t}) \right\}. \quad (151)$$

672 Using Taylor expansion and the constraint  $\dot{x}_t = F(x_t, u_t)$  we have to leading order that

$$V_{t+\delta t}(x_{t+\delta t}) = V_t(x_t) + (\partial_t V_t(x_t) + \langle \nabla_x V_t(x_t), F(x_t, u_t) \rangle) \delta t + O(\delta t^2). \quad (152)$$

673 Substituting back and also approximating the integral, we find that

$$V_t(x_t) = \min_u C(x_t, u_t) \delta t + V_t(x_t) + (\partial_t V_t(x_t) + \langle \nabla_x V_t(x_t), F(x_t, u_t) \rangle) \delta t \quad (153)$$

674 Cancelling terms, rearranging and taking a limit  $\delta t \downarrow 0$ , we get the desired result.

675 **Stochastic Hamilton-Jacobi-Bellman** Now we consider the *stochastic* variant of the HJB, in which  
676 case  $X_t$  is driven by an SDE of the form

$$dX_t = F(X_t, u_t) dt + \sigma_t dB_t. \quad (154)$$

677 The value function is thus in expectation:

$$V_0(x_0) = \min_u \mathbb{E} \left\{ \int_0^T C(X_t, u_t) dt + D(X_T) \right\}. \quad (155)$$

678 Carrying out the same expansion as before, we have

$$V_t(x_t) = \min_u \mathbb{E} \left\{ \int_t^{t+\delta t} C(X_s, u_s) ds + V_{t+\delta t}(X_{t+\delta t}) \right\}. \quad (156)$$

679 Note that in the above,  $(X_{t+\delta t} | X_t = x_t)$  is a random variable and hence so is  $V_{t+\delta t}(X_{t+\delta t})$  which is  
680 why it appears in the expectation. Using Ito's formula, to expand this, we get

$$\begin{aligned} V_{t+\delta t}(X_{t+\delta t}) &= V_t(X_t) + \left[ \partial_t V_t(X_t) + \frac{1}{2} \nabla \cdot (\sigma_t \sigma_t^\top \nabla_x V_t(X_t)) \right] dt + \langle \nabla_x V_t(X_t), dX_t \rangle \\ &= V_t(X_t) + \left[ \partial_t V_t(X_t) + \frac{1}{2} \nabla \cdot (\sigma_t \sigma_t^\top \nabla_x V_t(X_t)) + \langle \nabla_x V_t(X_t), F(X_t, u_t) \rangle \right] dt + \langle \nabla_x V_t(X_t), \sigma_t dB_t \rangle. \end{aligned}$$

681 Plugging this in, cancelling terms, and noting that the final term has zero expectation, we find that

$$0 = \partial_t V_t(X_t) + \min_u \{ \mathcal{A}[V_t](X_t, u_t) + C(X_t, u_t) \} \quad (157)$$

682 where  $\mathcal{A}$  is the generator of the SDE governing  $X_t$ , i.e.

$$\mathcal{A}[f](x, u) = \langle F(x, u), \nabla_x f(x) \rangle + \frac{1}{2} \nabla \cdot (\sigma_t \sigma_t^\top \nabla_x f). \quad (158)$$

683 The HJB equation for stochastic control problem is therefore

$$0 = \partial_t V_t(x) + \min_u \{ \mathcal{A}[V_t](x, u_t(x)) + C(x, u_t(x)) \}, \quad (159)$$

684 i.e. this is the same as the HJB for the deterministic case, except with a diffusive term arising from  
685 the stochasticity.

## B Experiment details

For (mvOU, BM)-OTFM and IPFP, all computations were carried out by CPU (8x Intel Xeon Gold 6254). NLSB and SBIRR computations were accelerated using a single NVIDIA L40S GPU.

### B.1 Gaussian benchmarking

We consider settings of dimension  $d \in \{2, 5, 10, 25, 50\}$  with data consisting of an initial and terminal Gaussian distribution and a mvOU reference process constructed as follows. We sample a  $d \times 2$  submatrix  $U$  from a random  $d \times d$  orthogonal matrix. Then for the reference process,  $A$  is constructed as the  $d \times d$  matrix

$$A = U \begin{bmatrix} 0 & 1 \\ -2.5 & 0 \end{bmatrix} U^\top.$$

Similarly, we let  $m = U \begin{bmatrix} 1 & -1 \end{bmatrix}^\top$ . For the marginals, we take  $\mathcal{N}(\mu_0, \Sigma_0)$  and  $\mathcal{N}(\mu_1, \Sigma_1)$  where

$$\begin{aligned} \mu_0 &= U \begin{bmatrix} -2.5 & -0.5 \end{bmatrix}^\top, & \Sigma_0 &= U \begin{bmatrix} 0.1 & 0.005 \\ 0.005 & 0.1 \end{bmatrix} U^\top + 0.1\mathbf{I}. \\ \mu_1 &= U \begin{bmatrix} 0.5 & 2.5 \end{bmatrix}^\top, & \Sigma_1 &= U \begin{bmatrix} 1.1 & -2 \\ -2 & 1.1 \end{bmatrix} U^\top + 0.1\mathbf{I}. \end{aligned}$$

For each  $d$ , the initial and final marginals are approximated by  $N = 128$  samples  $\{x_0^i\}_{i=1}^N \sim \mathcal{N}(\mu_0, \Sigma_0)$ ,  $\{x_1^i\}_{i=1}^N \sim \mathcal{N}(\mu_1, \Sigma_1)$ . We fix  $\sigma = \mathbf{I}$  and compute the exact marginal parameters  $(\mu_t, \Sigma_t)_{t \in [0,1]}$  using the formulas of Theorem 3 and reference parameters  $(A, m)$ . Additionally, we compute the SDE drift  $v_{\text{SB}}(t, x)$  of the mvOU-GSB using (17).

**(mvOU, BM)-OTFM** We apply mvOU-OTFM as per Algorithm 1 to learn a conditional flow matching approximation to the Schrödinger bridge. We choose to parameterise the probability flow and score fields using two feed-forward neural networks  $u_\theta(t, x) = \text{NN}_\theta(d+1, d)(t, x)$  and  $s_\varphi(t, x) = \text{NN}_\varphi(d+1, d)(t, x)$ , each with  $[64, 64, 64]$  hidden dimensions and ReLU activations. We use a batch size of 64 and learning rate  $10^{-2}$  for 2,500 iterations using the AdamW optimizer. For BM-OTFM, the same training procedure was used except the reference process was taken to be Brownian motion with unit diffusivity.

**IPFP** We use the IPFP implementation provided by the authors of [49], specifically using the variant of their algorithm based on Gaussian process approximations to the Schrödinger bridge drift [49, Algorithm 2]. We provide the mvOU reference process as the prior drift function, i.e.  $x \mapsto A(x - m)$  and employ an exponential kernel for the Gaussian process vector field approximation. We run the IPFP algorithm for 10 iterations, which is double that used in the original publication. Since IPFP explicitly constructs forward and reverse processes, at each time  $0 \leq t \leq 1$ , IPFP outputs *two* estimates of the Schrödinger bridge marginal, one from each process. We consider both outputs and distinguish between them using the  $(\rightarrow, \leftarrow)$  symbols in Table 1. For the vector field estimate we employ only the forward drift.

**NLSB** We use the NLSB implementation provided by the authors of [23]. Following [12, Section 4.6], for a mvOU reference process  $dX_t = f_t dt + \sigma dB_t$ , the generalised SB problem (SBP-dyn) can be rewritten as a stochastic control problem

$$\min_{u_t} \mathbb{E} \left[ \int_0^1 \frac{1}{2} \|u_t\|_2^2 dt \right], \text{ subject to } dX_t = (f_t + u_t) dt + \sigma dB_t.$$

On the other hand, the Lagrangian SB problem [23, Definition 3.1] is

$$\min_{v_t} \mathbb{E} \left[ \int_0^1 L(t, x, v_t(x)) dt \right], \text{ subject to } dX_t = v_t dt + \sigma dB_t.$$

This shows that the appropriate Lagrangian to use is  $L(t, x, v_t(x)) = \frac{1}{2} \|v_t(x) - f_t(x)\|_2^2$ . We apply this in the mvOU setting by taking  $f_t(x) = A(x - m)$ . The NLSB approach backpropagate through solution of the SDE to directly learn a neural approximation of the SB drift  $v_t$ . We train NLSB the same hyperparameters as used in the original publication, using the Adam optimizer with learning rate  $10^{-3}$  for a total of 2,500 epochs.

**Metrics** We measure both the approximation error of Gaussian Schrödinger bridge marginals as well as the error in vector field estimation. For the marginal reconstruction, for each method and for each  $0 \leq t \leq 1$  we sample points integrated forward in time and compute the mean  $\hat{\boldsymbol{\mu}}_t$  and variance  $\hat{\boldsymbol{\Sigma}}_t$  from samples. We then compare to the ground truth marginals  $(\boldsymbol{\mu}_t, \boldsymbol{\Sigma}_t)$  computed from exact formulas using the Bures-Wasserstein metric (62). For the vector field, for each method and for each time  $0 \leq t \leq 1$  we sample  $M = 1024$  points from the ground truth SB marginal  $\mathcal{N}(\boldsymbol{\mu}_t, \boldsymbol{\Sigma}_t)$  and empirically estimate  $\|\hat{\mathbf{v}}_{\text{SB}} - \mathbf{v}_{\text{SB}}\|_{\mathcal{N}(\boldsymbol{\mu}_t, \boldsymbol{\Sigma}_t)}$  from samples. All experiments were repeated over 5 independent runs and summary statistics for metrics are shown in Table 1.

## B.2 Gaussian mixture example

We consider initial and terminal marginals sampled from Gaussian mixtures. At time  $t = 0$ , we sample from

$$\mathcal{N}\left(\mathbf{U} \begin{bmatrix} -0.5 & -0.5 \end{bmatrix}^\top, 0.01\mathbf{U}\mathbf{U}^\top\right), \quad \mathcal{N}\left(\mathbf{U} \begin{bmatrix} 0.5 & 0.5 \end{bmatrix}^\top, 0.0625\mathbf{U}\mathbf{U}^\top\right)$$

in a 1:1 ratio, and at time  $t = 1$  we sample in the same fashion from

$$\mathcal{N}\left(\mathbf{U} \begin{bmatrix} -2.5 & -2.5 \end{bmatrix}^\top, 0.01\mathbf{U}\mathbf{U}^\top\right), \quad \mathcal{N}\left(\mathbf{U} \begin{bmatrix} 2.5 & 2.5 \end{bmatrix}^\top, 0.25\mathbf{U}\mathbf{U}^\top\right).$$

Here, the matrix  $\mathbf{U}$  and reference process parameters  $(\mathbf{A}, \mathbf{m})$  are the same as used for the previous Gaussian example for  $d = 10$ . All other training details are the same as for the Gaussian example.

## B.3 Repressilator example

Based on the system studied in [41], we simulate stochastic trajectories from the system

$$\begin{aligned} \frac{dx_1}{dt} &= \left( \frac{\beta}{1 + (x_3/k)^n} - \gamma x_1 \right) dt + \sigma dB_t^{(1)} \\ \frac{dx_2}{dt} &= \left( \frac{\beta}{1 + (x_1/k)^n} - \gamma x_2 \right) dt + \sigma dB_t^{(2)}, \\ \frac{dx_3}{dt} &= \left( \frac{\beta}{1 + (x_2/k)^n} - \gamma x_3 \right) dt + \sigma dB_t^{(3)}, \end{aligned} \quad \begin{bmatrix} \beta \\ n \\ k \\ \gamma \\ \sigma \end{bmatrix} = \begin{bmatrix} 10 \\ 3 \\ 1 \\ 1 \\ 0.1 \end{bmatrix}, \quad (160)$$

with initial condition  $\mathcal{N}([1, 1, 2], 0.01\mathbf{I})$  and simulated for the time interval  $t \in [0, 10]$  using the Euler-Maruyama discretisation. Snapshots were sampled at  $T = 10$  time points evenly spaced on  $[0, 10]$ , each comprising of 100 samples.

We employ Algorithm 2 to this data, running for 5 iterations starting from an initial Brownian reference process  $\mathbf{A} = \mathbf{0}, \mathbf{m} = \mathbf{0}$ . For the inner loop running mvOU-OTFM (Algorithm 1), we parameterise the probability flow and score as in the Gaussian example, with feed-forward networks of hidden dimension  $[64, 64, 64]$  and ReLU activations. We run mvOU-OTFM for 1,000 iterations using the AdamW optimiser, a batch size of 64 and a learning rate of  $10^{-2}$ . At each step of the outer loop, we employ ridge regression to fit the updated mvOU reference parameters  $(\mathbf{A}, \mathbf{m})$ . We do this using the standard RidgeCV method implemented in the scikit-learn package, which automatically selects the regularisation parameter.

We also carry out hold-one-out runs where for  $2 \leq i \leq 9$  (i.e. all time-points except for the very first and last), Algorithm 2 is applied to  $T - 1$  snapshots with the snapshot at  $t_i$  held out. Once the mvOU reference parameters are learned, forward integration of the learned mvOU-SB is used to predict the marginal at  $t_i$ . We report the reconstruction error in terms of the earth-mover distance (EMD) and energy distance [38]. Table 2 shows results averaged over held-out timepoints, and full results (split by timepoint) are shown in Table 4.

Since the system marginals are unimodal we reason that they can be reasonably well approximated by Gaussians. For each  $2 \leq i \leq 9$  we fit multivariate Gaussians to the snapshots at  $t_{i-1}, t_i, t_{i+1}$  and use the results of Theorem 3 with the fitted mvOU reference output by Algorithm 2 to solve the mvOU-GSB between  $p_{t_{i-1}}, p_{t_{i+1}}$ . This is illustrated in Figure 4 for  $i = 4$ , and we show the full results for all timepoints in Figure 6 in comparison with the standard Brownian GSB.

---

**Algorithm 2** Iterated reference fitting with mvOU-OTFM

---

**Input:** Samples  $\{\mathbf{x}_i^{t_j}\}_{i=1}^{N_j}$  from multiple snapshots at times  $\{t_j\}_{j=1}^T$ , initial mvOU reference parameters  $(\mathbf{A}, \mathbf{m})$ , diffusivity  $\mathbf{D} = \frac{1}{2}\sigma\sigma^\top$

**Initialise:** Probability flow field  $\mathbf{u}_t^\theta(\mathbf{x})$ , score field  $\mathbf{s}_t^\varphi(\mathbf{x})$ .

**Define:**  $\text{FitReference}(\mathbf{X}, \mathbf{V}) := \arg \min_{\mathbf{A}, \mathbf{m}} \|\mathbf{V} - \mathbf{A}(\mathbf{X} - \mathbf{m})\|_2^2 + \lambda \|\mathbf{A}\|_F^2 + \gamma \|\mathbf{m}\|^2$

$\hat{\rho}_j \leftarrow N^{-1} \sum_{i=1}^N \delta_{\mathbf{x}_i^{t_j}}, 1 \leq j \leq T$  *Form empirical marginals*

**while** not converged **do**

$(\mathbf{u}_t^\theta, \mathbf{s}_t^\varphi) \leftarrow \text{fitOTFM}_{(\mathbf{A}, \mathbf{m}, \mathbf{D})}(\hat{\rho}_1, \dots, \hat{\rho}_T)$  *Fit flow and score with reference parameters*

$\mathbf{v}_i^{t_j} \leftarrow (\mathbf{u}_{t_j}^\theta + \mathbf{D}\mathbf{s}_{t_j}^\varphi)(\mathbf{x}_i^{t_j}), 1 \leq i \leq N_j, 1 \leq j \leq T$  *Get SDE drift*

$\mathbf{A}, \mathbf{m} \leftarrow \text{FitReference}(\{(\mathbf{v}_i^{t_j})_{i=1}^{N_j}\}_{j=1}^T, \{(\mathbf{x}_i^{t_j})_{i=1}^{N_j}\}_{j=1}^T)$  *Update reference parameters*

**end while**

---

| Error metric | $t$ | Leave-one-out marginal interpolation error |                 |                                   |                                   |                                   |                 | SBIRR (mvOU)                      | SBIRR (MLP) |
|--------------|-----|--------------------------------------------|-----------------|-----------------------------------|-----------------------------------|-----------------------------------|-----------------|-----------------------------------|-------------|
|              |     | Iterate 0                                  | Iterate 1       | Iterate 2                         | Iterate 3                         | Iterate 4                         |                 |                                   |             |
| EMD          | 1   | $3.59 \pm 0.17$                            | $3.14 \pm 0.12$ | $2.28 \pm 0.15$                   | $2.08 \pm 0.11$                   | <b><math>2.02 \pm 0.11</math></b> | $2.24 \pm 0.28$ | $2.71 \pm 0.41$                   |             |
|              | 2   | $5.20 \pm 0.47$                            | $2.59 \pm 0.29$ | $1.62 \pm 0.28$                   | $1.27 \pm 0.25$                   | <b><math>1.13 \pm 0.16</math></b> | $3.13 \pm 0.62$ | $2.29 \pm 0.92$                   |             |
|              | 3   | $3.23 \pm 0.24$                            | $1.42 \pm 0.18$ | $1.10 \pm 0.14$                   | $0.86 \pm 0.08$                   | <b><math>0.83 \pm 0.10</math></b> | $2.67 \pm 0.85$ | $1.39 \pm 0.55$                   |             |
|              | 4   | $1.48 \pm 0.20$                            | $0.52 \pm 0.05$ | $0.47 \pm 0.05$                   | <b><math>0.47 \pm 0.06</math></b> | $0.48 \pm 0.06$                   | $1.38 \pm 0.46$ | $0.94 \pm 0.28$                   |             |
|              | 5   | $2.50 \pm 0.40$                            | $1.43 \pm 0.65$ | <b><math>1.12 \pm 0.32</math></b> | $1.29 \pm 0.11$                   | $1.21 \pm 0.13$                   | $1.63 \pm 0.17$ | $1.40 \pm 0.71$                   |             |
|              | 6   | $6.18 \pm 0.41$                            | $3.42 \pm 0.50$ | $2.18 \pm 0.28$                   | $1.91 \pm 0.38$                   | <b><math>1.75 \pm 0.17</math></b> | $2.40 \pm 0.32$ | $1.96 \pm 1.41$                   |             |
|              | 7   | $2.56 \pm 0.25$                            | $3.09 \pm 1.53$ | $2.13 \pm 0.46$                   | $2.23 \pm 0.55$                   | $1.93 \pm 0.50$                   | $1.45 \pm 0.20$ | <b><math>0.51 \pm 0.13</math></b> |             |
|              | 8   | $2.29 \pm 0.26$                            | $2.12 \pm 0.09$ | $1.82 \pm 0.33$                   | $1.81 \pm 0.31$                   | <b><math>1.81 \pm 0.16</math></b> | $1.93 \pm 0.61$ | $2.14 \pm 0.40$                   |             |
| Energy       | 1   | $3.00 \pm 0.09$                            | $2.75 \pm 0.07$ | $2.24 \pm 0.10$                   | $2.10 \pm 0.07$                   | <b><math>2.05 \pm 0.08</math></b> | $2.20 \pm 0.18$ | $2.56 \pm 0.26$                   |             |
|              | 2   | $3.53 \pm 0.21$                            | $2.27 \pm 0.19$ | $1.66 \pm 0.20$                   | $1.38 \pm 0.21$                   | <b><math>1.26 \pm 0.13</math></b> | $2.61 \pm 0.33$ | $2.05 \pm 0.61$                   |             |
|              | 3   | $2.29 \pm 0.17$                            | $1.31 \pm 0.16$ | $1.00 \pm 0.10$                   | $0.80 \pm 0.06$                   | <b><math>0.78 \pm 0.07</math></b> | $2.10 \pm 0.52$ | $1.25 \pm 0.43$                   |             |
|              | 4   | $0.93 \pm 0.14$                            | $0.25 \pm 0.06$ | $0.17 \pm 0.04$                   | $0.15 \pm 0.02$                   | <b><math>0.14 \pm 0.01</math></b> | $0.99 \pm 0.38$ | $0.84 \pm 0.25$                   |             |
|              | 5   | $1.10 \pm 0.18$                            | $0.53 \pm 0.27$ | <b><math>0.45 \pm 0.13</math></b> | $0.55 \pm 0.04$                   | $0.51 \pm 0.07$                   | $0.64 \pm 0.10$ | $0.66 \pm 0.37$                   |             |
|              | 6   | $2.49 \pm 0.12$                            | $1.22 \pm 0.10$ | $1.13 \pm 0.15$                   | $1.01 \pm 0.22$                   | $0.91 \pm 0.11$                   | $1.43 \pm 0.17$ | <b><math>0.90 \pm 0.64</math></b> |             |
|              | 7   | $0.97 \pm 0.13$                            | $1.39 \pm 0.65$ | $1.02 \pm 0.21$                   | $1.05 \pm 0.25$                   | $0.91 \pm 0.25$                   | $0.65 \pm 0.09$ | <b><math>0.17 \pm 0.08</math></b> |             |
|              | 8   | $0.54 \pm 0.11$                            | $0.57 \pm 0.03$ | $0.56 \pm 0.11$                   | $0.55 \pm 0.10$                   | $0.55 \pm 0.04$                   | $0.48 \pm 0.08$ | <b><math>0.36 \pm 0.06</math></b> |             |

Table 4: Full results for repressilator example

**SBIRR** We apply SBIRR [41] using the implementation provided with the original publication, which notably includes an improved implementation of IPFP [49] that utilises GPU acceleration. We provide the reference vector field  $\mathbf{x} \mapsto \mathbf{A}(\mathbf{x} - \mathbf{m})$  and seek to learn a reference process in one of two families: (1) mvOU processes, i.e. we consider the family of reference drifts  $\hat{\mathbf{A}}(\mathbf{x} - \hat{\mathbf{m}})$  where  $\hat{\mathbf{A}}, \hat{\mathbf{m}}$  are to be fit, or (2) general drifts, i.e. we parameterise the drift using a feed-forward neural network with hidden dimensions [64, 64, 64]. For each choice of reference family, we run Algorithm 1 of [41] for 5 outer iterations and 10 inner IPFP iterations, as was also done in the original paper.

#### B.4 Cell cycle scRNA-seq

The metabolic labelled cell cycle dataset of [4] is obtained and preprocessed following the tutorial available with the Dynamo [37] package. This gives a dataset of  $N = 2,793$  cells, embedded in 30 PCA dimensions. In addition to transcriptional state  $\{\mathbf{x}_i\}_{i=1}^N$ , Dynamo uses metabolic labelling data to predict the transcriptional velocity  $\{\hat{\mathbf{v}}_i\}_{i=1}^N$  for each cell.

To fit the reference process parameters  $(\mathbf{A}, \mathbf{m})$ , we use again ridge regression via the RidgeCV method in `scikit-learn`. We train mvOU-OTFM using Algorithm 1 with  $\sigma = 0.3$ , parameterising the probability flow and score as previously using feed-forward networks of hidden dimensions [64, 64, 64] and train with a batch size of 64, learning rate of  $10^{-2}$  for a total of 1,000 iterations.



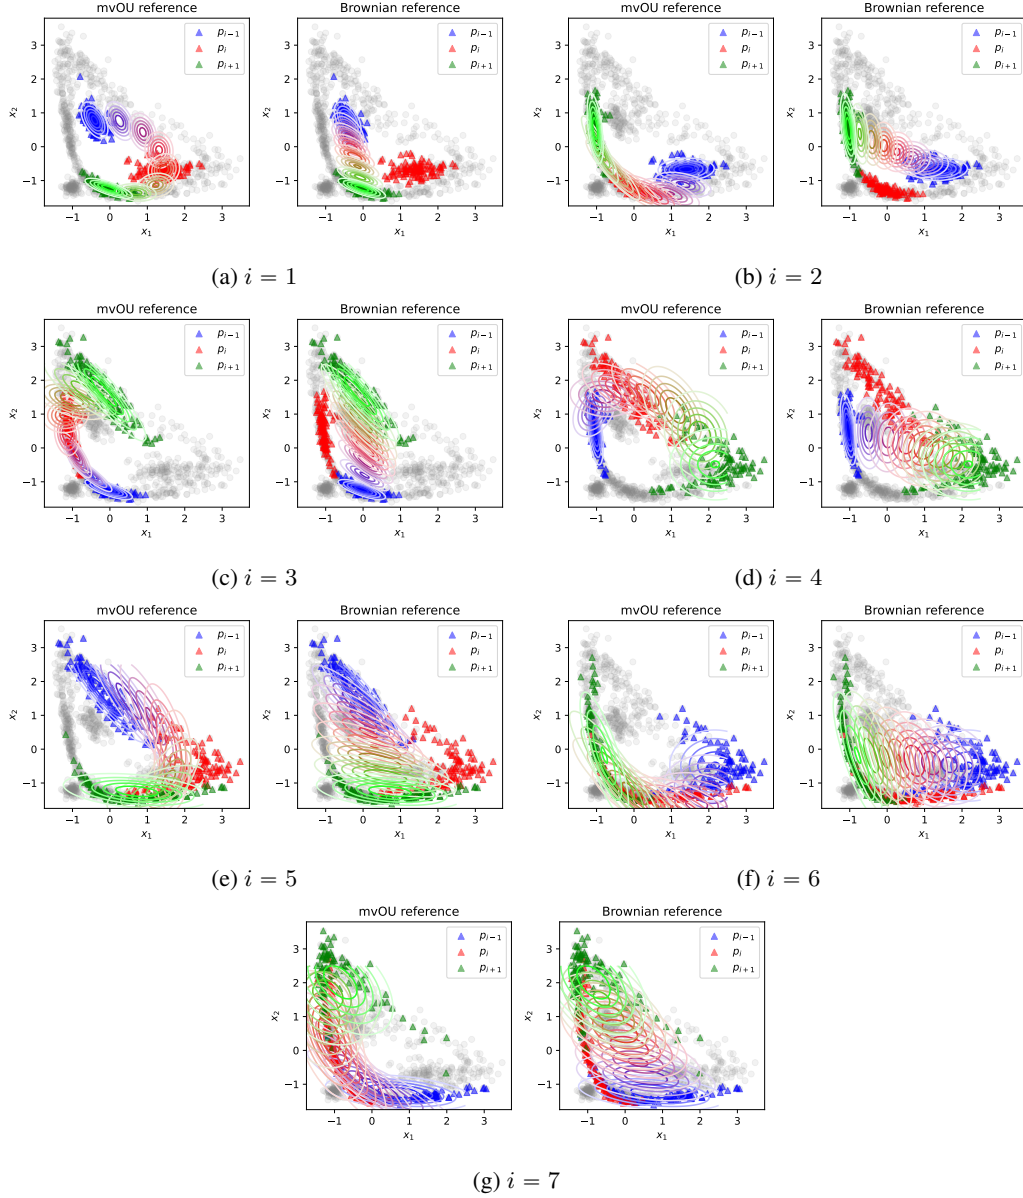

Figure 6: **Repressilator mvOU-GSB interpolation.** Using the learned mvOU reference process, we interpolate between  $p_{i-1}$  (blue) and  $p_{i+1}$  (green). Middle timepoint  $p_i$  is shown in red.

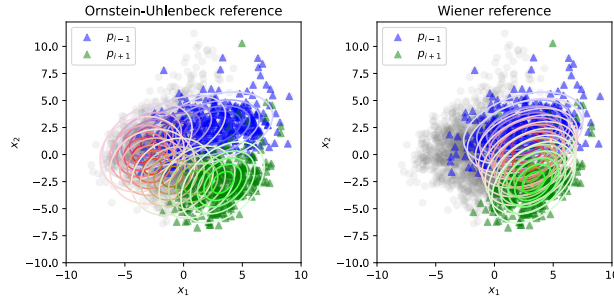

Figure 7: **Cell cycle mvOU-GSB interpolation.** Using the learned mvOU reference process and scale factor  $\gamma = 50$ , we interpolate between the first snapshot  $p_1$  (blue) and last snapshot  $p_T$  (green). All computations are done in  $d = 30$  and shown in leading 2 PCs.
